# Supplementary material for: Increased risk of aortic aneurysm and dissection in patients with Sjögren’s syndrome: a nationwide population-based cohort study in Taiwan
Source: PubMed Central journal article supplement — BMJ Open. 2018 Sep 21;8(9):e022326. doi: 10.1136/bmjopen-2018-022326 (PMC6157519; doi:10.1136/bmjopen-2018-022326), 2018-09-21
Supplement: bmjopen-2018-022326.draft_revisions.pdf [file bmjopen-2018-022326.draft_revisions.pdf]

# BMJ Open

BMJ Open is committed to open peer review. As part of this commitment we make the peer review history of every article we publish publicly available.

When an article is published we post the peer reviewers' comments and the authors' responses online. We also post the versions of the paper that were used during peer review. These are the versions that the peer review comments apply to.

The versions of the paper that follow are the versions that were submitted during the peer review process. They are not the versions of record or the final published versions. They should not be cited or distributed as the published version of this manuscript.

BMJ Open is an open access journal and the full, final, typeset and author-corrected version of record of the manuscript is available on our site with no access controls, subscription charges or pay-per-view fees (<http://bmjopen.bmj.com>).

If you have any questions on BMJ Open's open peer review process please email [info.bmjopen@bmj.com](mailto:info.bmjopen@bmj.com)

# BMJ Open

## Increased risk of aortic aneurysm and dissection in patients with Sjögren's syndrome: a nationwide population-based cohort study

|                               |                                                                                                                                                                                                                                                                                                                                                                                                                                                                                                                                                                                                                                                                                                                                                                                                                                                                                                                                                                                                                                                                                                                                                                                                                                                                                                                                                                                 |
|-------------------------------|---------------------------------------------------------------------------------------------------------------------------------------------------------------------------------------------------------------------------------------------------------------------------------------------------------------------------------------------------------------------------------------------------------------------------------------------------------------------------------------------------------------------------------------------------------------------------------------------------------------------------------------------------------------------------------------------------------------------------------------------------------------------------------------------------------------------------------------------------------------------------------------------------------------------------------------------------------------------------------------------------------------------------------------------------------------------------------------------------------------------------------------------------------------------------------------------------------------------------------------------------------------------------------------------------------------------------------------------------------------------------------|
| Journal:                      | <i>BMJ Open</i>                                                                                                                                                                                                                                                                                                                                                                                                                                                                                                                                                                                                                                                                                                                                                                                                                                                                                                                                                                                                                                                                                                                                                                                                                                                                                                                                                                 |
| Manuscript ID                 | bmjopen-2018-022326                                                                                                                                                                                                                                                                                                                                                                                                                                                                                                                                                                                                                                                                                                                                                                                                                                                                                                                                                                                                                                                                                                                                                                                                                                                                                                                                                             |
| Article Type:                 | Research                                                                                                                                                                                                                                                                                                                                                                                                                                                                                                                                                                                                                                                                                                                                                                                                                                                                                                                                                                                                                                                                                                                                                                                                                                                                                                                                                                        |
| Date Submitted by the Author: | 15-Feb-2018                                                                                                                                                                                                                                                                                                                                                                                                                                                                                                                                                                                                                                                                                                                                                                                                                                                                                                                                                                                                                                                                                                                                                                                                                                                                                                                                                                     |
| Complete List of Authors:     | <p>Tsai, Yi-Da; Tri-Service General Hospital, National Defense Medical Center, Department of Emergency medicine</p> <p>Chien, Wu-Chien ; Tri-Service General Hospital, National Defense Medical Center, Department of Medical Research; National Defense Medical Center, School of Public Health</p> <p>Tsai, Shih-Hung ; Tri-Service General Hospital, National Defense Medical Center, Department of Emergency Medicine</p> <p>Chung, Chi-Hsiang; Tri-Service General Hospital, National Defense Medical Center, Department of Medical Research; National Defense Medical Center, School of Public Health</p> <p>Chu, Shi-Jye ; Tri-Service General Hospital, National Defense Medical Center, Division of Rheumatology, Immunology and Allergy, Department of Internal Medicine</p> <p>Chen, Sy-Jou ; Tri-Service General Hospital, National Defense Medical Center, Department of Emergency Medicine</p> <p>Liao, Wen-I; Tri-Service General Hospital, National Defense Medical Center, Department of Emergency Medicine</p> <p>Yang, Chih-Jen; Tri-Service General Hospital, National Defense Medical Center, Emergency Medicine</p> <p>Liao, Min-Tser ; Taoyuan Armed Forces General Hospital,, Department of Pediatrics</p> <p>Wang, Jen-Chun; Tri-Service General Hospital, National Defense Medical Center, department of Emergency Medicine, Emergency Department</p> |
| Keywords:                     | Sjögren's syndrome, aortic dissection, aortic aneurysm                                                                                                                                                                                                                                                                                                                                                                                                                                                                                                                                                                                                                                                                                                                                                                                                                                                                                                                                                                                                                                                                                                                                                                                                                                                                                                                          |

SCHOLARONE™  
Manuscripts

1  
2  
3  
4 **Increased risk of aortic aneurysm and dissection in patients with Sjögren's**  
5  
6 **syndrome: a nationwide population-based cohort study**  
7  
8  
9  
10

11  
12 Yi-Da Tsai MD <sup>1</sup>, Wu-Chien Chien PhD <sup>2,3</sup>, Shih-Hung Tsai MD, PhD <sup>1</sup>, Chi-Hsiang  
13  
14 Chung PhD <sup>2,3,4</sup>, Shi-Jye Chu MD <sup>5</sup>, Sy-Jou Chen MD, MS <sup>1,6</sup>, Wen-I Liao MD <sup>1</sup>,  
15  
16  
17 Chih-Jen Yang MD<sup>1</sup>, Min-Tser Liao, MD <sup>7</sup>, Jen-Chun Wang MD <sup>1,8,\*</sup>  
18  
19  
20  
21  
22

23 <sup>1</sup> Department of Emergency Medicine, Tri-Service General Hospital, National  
24  
25  
26 Defense Medical Center, Taipei, Taiwan  
27  
28

29 <sup>2</sup> Department of Medical Research, Tri-Service General Hospital, National Defense  
30  
31  
32 Medical Center  
33

34 <sup>3</sup> School of Public Health, National Defense Medical Center, Taipei, Taiwan  
35  
36

37 <sup>4</sup> Taiwanese Injury Prevention and Safety Promotion Association, Taipei, Taiwan  
38  
39

40 <sup>5</sup> Division of Rheumatology, Immunology and Allergy, Department of Internal Medicine,  
41  
42  
43 Tri-Service General Hospital, National Defense Medical Center, Taipei, Taiwan  
44  
45

46 <sup>6</sup> Graduate Institute of Injury Prevention and Control, College of Public Health and  
47  
48  
49 Nutrition, Taipei Medical University, Taipei, Taiwan  
50

51 <sup>7</sup> Department of Pediatrics, Taoyuan Armed Forces General Hospital, Taoyuan, Taiwan  
52  
53

54 <sup>8</sup> Institute of Clinical Medicine, National Yang-Ming University, Taipei, Taiwan  
55  
56  
57  
58  
59  
60

1  
2  
3  
4  
5  
6 \*Corresponding authors:  
7  
8

9 **Dr. Jen-Chun Wang**

10 Department of Emergency Medicine,  
11

12 Tri-Service General Hospital, National Defense Medical Center, Taipei, Taiwan  
13

14 No. 325, Sec. 2, Cheng-Kung Road, Neihu Dist., Taipei City 11490, Taiwan  
15

16 Tel.: + 886-2-87923311-16877;  
17

18 Fax: + 886-2-87927034  
19

20 E-mail: royalflushwang@gmail.com  
21  
22  
23  
24  
25

## 26 **Funding**

27 This study was supported by grants from Tri-Service General Hospital, National  
28

29 Defense Medical Center, Taipei, Taiwan (TSGH-C105-058); Tri-Service General  
30

31 Hospital, National Defense Medical Center, Taipei, Taiwan (TSGH-C105-173);  
32

33 Taoyuan Armed Forces General Hospital, Taoyuan, Taiwan (10514); and the Ministry  
34

35 of Science and Technology (MOST 106-2314-B-016 -008 -MY3).  
36  
37  
38  
39  
40  
41  
42  
43  
44  
45  
46  
47  
48  
49  
50  
51  
52  
53  
54  
55  
56  
57  
58  
59  
60

## **Abstract**

### ***Objectives***

Sjögren's syndrome (SS) is a systemic autoimmune disorder. Several molecular pathways and the activation of matrix metalloproteinases associated with the pathogenesis of SS participate in the initiation and progression of aortic aneurysm (AA) and aortic dissection (AD). In this study, we aimed to evaluate whether patients with SS exhibit an increased risk of AA and AD.

### ***Methods***

We conducted a retrospective cohort study using a database extracted from Taiwan's National Health Insurance Research Database (NHIRD). All medical conditions for each case and control were categorized using the International Classification of Diseases, 9<sup>th</sup> Revision (ICD-9). Odds ratios (ORs) and 95% confidence intervals (CIs) for associations between SS and AA/AD were estimated using Cox regression and adjusted for co-morbidities.

### ***Results***

Our analyses included 10,941 SS cases and 43,764 propensity score-matched controls. Compared with the controls, the patients with SS exhibited a significantly increased risk of developing an AA and AD (adjusted OR = 3.642,  $P < 0.001$ ). The subgroup analysis revealed that patients with primary and secondary SS both

1  
2  
3 exhibited a significantly increased risk of developing AA and AD compared with  
4  
5  
6 patients without SS (adjusted hazard ratio (HR) = 1.753, P = 0.042; adjusted HR =  
7  
8  
9 3.693, P < 0.001).  
10

### 11 **Conclusion**

12  
13  
14 Patients with SS exhibit increased risks of developing AA and AD, and  
15  
16  
17 healthcare professionals should be aware of this risk when treating patients with SS.  
18  
19  
20 Increased aortic surveillance may be required in patients with SS syndrome.  
21  
22  
23  
24  
25

26 **Keywords:** Sjögren's syndrome, aortic dissection, aortic aneurysm  
27  
28  
29  
30  
31  
32  
33  
34  
35  
36  
37  
38  
39  
40  
41  
42  
43  
44  
45  
46  
47  
48  
49  
50  
51  
52  
53  
54  
55  
56  
57  
58  
59  
60

### Strengths and limitations of this study

- The strength of our study is its population-based cohort design. We excluded confounding factors, including comorbidities, from our study.
- We intended to control for potential disease-associated confounders to the utmost extent possible, unmeasured or unknown confounders may have existed in our findings.
- This was a retrospective cohort study.
- NHIRD can not provide detailed information regarding the laboratory results or lifestyle factors of the patients.
- Our results are limited to human data. It required both mechanistic and animal studies for further clarification.

## Introduction

Sjögren's syndrome (SS) is a systemic autoimmune disorder commonly presenting with dry eyes and mouth. The prevalence of SS is between 0.1% and 4.8% in various populations when strictly defined according to the American-European Consensus Criteria, and it is one of the most common autoimmune diseases<sup>1</sup>. SS may affect patients at any age, but more cases occur in the fourth decade of life, and there is a female predominance. The female-male ratio is approximately 9:1<sup>2</sup>. Aortic aneurysms (AAs) are often diagnosed inadvertently and are a common cause of sudden death. Enlarged aneurysms can result in rupture. Aortic dissection (AD) is one of the most deadly complications of thoracic aortic disease. The incidence of AD ranges from 6 cases per 100,000 to 9.1 per 100,000 in women and 16.3 per 100,000 in men annually based on studies in England and Sweden<sup>3,4</sup>. Regarding the Asian population, the average annual incidence of AD was 5.6 per 100,000 persons in Taiwan, and the prevalence was 19.9 per 100,000 persons, with a predominance noted among men 50 to 54 years of age (27.3 per 100,000 persons per year)<sup>5</sup>.

Previous studies have demonstrated that AA is more prevalent in patients with rheumatoid arthritis (RA) and systemic lupus erythematosus (SLE) compared with the general population<sup>6,7</sup>. Compared with age- and sex-matched healthy controls, primary SS (PSS) patients exhibited a 2-fold increased prevalence of hypertension and hypertriglyceridemia. Furthermore, hypertension is underdiagnosed and suboptimally



1  
2  
3 treated in PSS<sup>8</sup>. SS with positive autoantibodies is associated with a low  
4  
5  
6 ankle-brachial index, which may indicate an increased risk of early atherosclerosis<sup>9</sup>.  
7  
8  
9 Nonetheless, previous population-based studies indicated that SS is not associated  
10  
11  
12 with an increased risk of subsequent acute myocardial infarction (AMI) and ischaemic  
13  
14  
15 stroke<sup>10 11</sup>.

16  
17  
18 Several molecular mechanisms, including JNK, NF- $\kappa$ B and TGF- $\beta$  signalling  
19  
20  
21 pathways, and matrix metalloproteinase (MMP) activation are associated with the  
22  
23  
24 pathogenesis of SS<sup>12 13</sup>. These molecular mechanisms also actively participate in the  
25  
26  
27 initiation and progression of AA and AD<sup>14 15</sup>. Taken together, we hypothesized that  
28  
29  
30 patients with SS may have an increased risk of AA and AD due to SS-related  
31  
32  
33 cardiovascular risks and shared molecular mechanisms. However, the association  
34  
35  
36 between SS and AA or AD has not been thoroughly evaluated in large-scale studies.  
37  
38  
39 Therefore, we aimed to determine whether SS patients exhibit an increased risk of AA  
40  
41  
42 and AD using a nationwide healthcare insurance claim database.  
43  
44  
45

## 46 **Methods**

### 47 ***Data source***

48  
49  
50  
51 The data described herein were acquired from the Longitudinal Health Insurance  
52  
53  
54 Database 2005 (LHID 2005), a subgroup database of the Taiwan National Health  
55  
56  
57

1  
2  
3  
4 Insurance Research Database (NHIRD) used for the nationwide population-based  
5  
6 retrospective cohort study. The National Health Insurance programme in Taiwan  
7  
8 provides health care for 99% of the population (greater than 23 million people) and  
9  
10 was implemented in 1995. The LHID 2005 provides information on medical service  
11  
12 utilization using a randomly selected sample of approximately one million people  
13  
14 receiving benefits, representing approximately 5% of Taiwan's population in 2005.  
15  
16  
17  
18  
19  
20 The information was obtained from the NHIRD between 2000 and 2010. The  
21  
22 accuracy of the diagnoses in the NHIRD, particularly the diagnoses of major diseases  
23  
24 (e.g., acute coronary syndrome and stroke), has been corroborated [16 17](#). The LHID is  
25  
26 composed of "de-identified" secondary data that are available to the public via open  
27  
28 access for research. ICD-9-CM (International Classification of Diseases, 9th Revision,  
29  
30 Clinical Modification) diagnostic and procedure codes (up to five each), genders,  
31  
32 birthdays, patient identification numbers, dates of admission and discharge, and  
33  
34 outcomes are coded. In addition, information regarding the medical institutions that  
35  
36 served patients was obtained. Individual information was protected using encoded  
37  
38 personal identification to prevent ethical violations related to the data. Our study  
39  
40 conformed to the Declaration of Helsinki and relevant guidelines. This Institutional  
41  
42 Review Board of the Tri-Service General Hospital, National Defense Medical Center,  
43  
44 Taipei, Taiwan, permitted this study (TSGH IRB No.2-105-05-082).  
45  
46  
47  
48  
49  
50  
51  
52  
53  
54  
55  
56  
57  
58  
59  
60

### *Sampled patients*

This study utilized study and comparison cohorts. Using the LHID 2005, we selected adult patients aged >20 years who were newly diagnosed with SS (ICD-9-CM 710.2) and were followed-up between 2000 and 2010. We excluded patients who were diagnosed with SS, AA and AD (ICD-9-CM 441.0-441.9); Turner syndrome (ICD-9-CM 758.6); aortic coarctation (ICD-9-CM 747.10); bicuspid aortic valve (ICD-9-CM 746.4); Marfan syndrome (ICD-9-CM 759.82); and Ehler-Danlos syndrome (ICD-9-CM 756.83). Patients had a tracking time < 6 months. The date of SS diagnosis was used as the index date. Control candidate sampling comparisons were selected from individuals in the LHID 2005 who lacked a history of SS. The patients and control cohorts were selected by 1:4 matching according to the following baseline variables: age; sex; co-morbidities, including hypertension (ICD-9-CM 401-405), diabetes mellitus (DM) (ICD-9-CM 250), hyperlipidaemia (ICD-9-CM 272.0-272.4), Behcet's disease (ICD-9-CM 136.1), giant cell arteritis (ICD-9-CM 446.5), RA and other inflammatory polyarthropathies (ICD-9-CM 714), relapsing polychondritis (ICD-9-CM 733.99), Takayasu's arteritis (ICD-9-CM 446.7) and chronic obstructive pulmonary disease (COPD) (ICD-9-CM 490-496); and medication history, including  $\beta$ -blocker, calcium channel blocker, angiotensin-converting enzyme

1  
2  
3  
4 inhibitor, angiotensin receptor blocker, diuretic and steroid history. We also divided  
5  
6 SS patients into primary SS and secondary SS (SSS) patients and performed a  
7  
8 subgroup analysis. SS in patients was previously diagnosed as SLE (ICD-9-CM  
9  
10 710.0), RA (ICD-9-CM 714), systemic sclerosis (ICD-9-CM 701.1), or primary  
11  
12 biliary cirrhosis (ICD-9-CM 571.6), which was defined as SSS. The index dates for  
13  
14 control patients were the same as the corresponding dates for patients with AA/AD.  
15  
16 The study outcome was a diagnosis of AA/AD during the 10-year follow-up period.  
17  
18 AA/AD was identified using ICD-9 codes. The end point of the follow-up period was  
19  
20 2010-12-31 or the time at which AA/AD events occurred or the patient died.  
21  
22  
23  
24  
25  
26  
27  
28  
29  
30

### 31 ***Statistical analysis***

32  
33  
34 Categorical variables, which are presented as percentages, were compared using  
35  
36 the chi-square or Fisher's exact tests. Continuous variables, which are presented as the  
37  
38 means and standard deviations, were compared using a t-test. The primary goal of the  
39  
40 study was to determine whether SS patients exhibit an increased risk for developing  
41  
42 AA/AD. The association between those outcomes (prognoses) and clinical  
43  
44 characteristics was investigated using Cox regression. The results are presented as  
45  
46 adjusted hazard ratios (HRs) with corresponding 95% confidence intervals (CIs). The  
47  
48 threshold for statistical significance was  $P < 0.05$ . All data analyses were conducted  
49  
50  
51  
52  
53  
54  
55  
56  
57  
58  
59  
60

1  
2  
3  
4 using SPSS software version 22 (SPSS Inc., Chicago, IL, USA).  
5  
6  
7

## 8 9 **Results**

10  
11 A flow diagram of our patient enrolment scheme is presented in Figure 1. A total  
12 of 10,941 patients diagnosed with SS were identified in the NHIRD, which contains a  
13 total of 986,713 individuals. An additional 43,764 age-, gender-, comorbidity-, and  
14 medication-matched patients were designated controls. As shown in Table 1, no  
15 significant differences in gender, age or co-morbidities, including DM, hypertension,  
16 hyperlipidaemia, Behcet's disease, giant cell arteritis, RA, relapsing polychondritis,  
17 Takayasu's arteritis, COPD, and medications, were noted between the two groups after  
18 matching. Patients with SS exhibited a significantly increased cumulative risk of  
19 developing AA/AD in subsequent years compared with patients without SS (log rank  
20 test < 0.001, Figure 2). Table 2 presents the incidences of AA and AD during the  
21 ten-year follow-up period. At the end of the follow-up period, SS patients exhibited  
22 significantly increased incidences of AA/AAD (0.43% vs. 0.37%,  $P = 0.045$ ) but  
23 lower incidences of DM (7.73% vs. 15.44%,  $P < 0.001$ ) and COPD (5.96% vs. 6.72%,  
24  $P = 0.004$ ). In addition, patients with SS were younger and exhibited an increased CCI  
25 compared with patients without SS. Regarding the use of Cox regression independent  
26 of the effects of gender, age, co-morbidities and medication, patients with SS also  
27  
28  
29  
30  
31  
32  
33  
34  
35  
36  
37  
38  
39  
40  
41  
42  
43  
44  
45  
46  
47  
48  
49  
50  
51  
52  
53  
54  
55  
56  
57  
58  
59  
60

1  
2  
3  
4 exhibited a significantly increased risk of developing AA/AD compared with patients  
5  
6 without SS (adjusted HR = 3.642, 95% CI = 2.527-5.250, P < 0.001, Table 3). The  
7  
8 subgroup analysis revealed that patients with PSS or SSS both exhibited significantly  
9  
10 increased risks for developing AA/AD compared with patients without SS (adjusted  
11  
12 HR = 1.753, 95% CI = 1.108-9.382, P = 0.042; adjusted HR = 3.693, 95% CI =  
13  
14 2.520-5.411, P < 0.001, Table 4).  
15  
16  
17  
18  
19  
20  
21  
22

## 23 Discussion

24  
25  
26 Our study is a retrospective cohort study that enrolled 10,941 patients with SS  
27  
28 and 43,764 patients without SS matched by age, sex, year of index date of SS  
29  
30 diagnosis, co-morbidities and medication from a large-scale nationwide  
31  
32 population-based database. During follow-up, SS was associated with an increased  
33  
34 incidence of the development of AA/AD compared with the comparison cohort.  
35  
36  
37  
38

39  
40 SS patients exhibit an increased prevalence of developing traditional  
41  
42 cardiovascular risk factors, such as hypertension and dyslipidaemia, which predispose  
43  
44 patients to endothelial dysfunction and premature atherosclerosis. However, the  
45  
46 disease-specific mechanisms associated with premature atherosclerosis in SS are not  
47  
48 fully understood <sup>18</sup>. In a recent review article, cardiovascular disease was reported to  
49  
50 be one of the primary causes of mortality in SS patients <sup>19</sup>. Primary SS shares clinical  
51  
52  
53  
54  
55  
56  
57  
58  
59  
60

1  
2  
3  
4 and serological features with RA and SLE, and these two diseases are associated with  
5  
6 acceleration of atherosclerosis <sup>20</sup>. However, the pathophysiology between SS and  
7  
8 AA/AD remains unclear, although several possible mechanisms have been proposed.  
9  
10  
11 Previous studies have demonstrated that both SS and AA/AD are induced by chronic  
12  
13 inflammation. <sup>21-24</sup> Recent studies have provided convincing evidence indicating that  
14  
15 several signalling pathways are involved in both AA and SS, including the MAPK,  
16  
17 TGF- $\beta$ , and MMP signalling pathways <sup>12-15</sup>. Activation of the innate immune system  
18  
19 and the production of interferons (IFNs) could be the first stages of primary SS  
20  
21 pathogenesis <sup>25</sup>. IFNs and IL-21 could induce B-cell-activating factor (BAFF) and  
22  
23 further activate B cell activity. In human salivary gland cells, interferon- $\gamma$  modulates  
24  
25 and increases MMP-2 and MMP-9 expression <sup>26</sup>. The circulating levels of MMP-9  
26  
27 were increased in patients with definite SS compared with patients with possible SS <sup>27</sup>.  
28  
29 Furthermore, MMP-2 and MMP-9 also display a critical role in AAA formation <sup>28</sup>.  
30  
31  
32  
33  
34  
35  
36  
37  
38  
39  
40  
41  
42  
43  
44  
45  
46  
47  
48  
49  
50  
51  
52  
53  
54  
55  
56  
57  
58  
59  
60

As a downstream effector molecule of CD40, the JNK cascade is activated in salivary infiltrating T cells and mononucleated cells in patients with SS <sup>12 13</sup>. JNK plays a pivotal role in IL-1 $\beta$ -mediated inhibition of lacrimal gland secretion and

1  
2  
3  
4 subsequent dry eye <sup>30</sup>. JNK is not only involved in T cell infiltration in salivary glands  
5  
6 but is also associated with subsequent NF-κB activation, MMP activation and reactive  
7  
8 oxygen species (ROS) production <sup>21 31</sup>. Increased TGF-β signalling was observed in  
9  
10 salivary glands with increased Smad2 phosphorylation and concomitant increases in  
11  
12 extracellular matrix deposition. In a mouse study of SS, aberrant TGF-β  
13  
14 overexpression caused salivary gland hypofunction <sup>32</sup>. In addition, TGFBR1 and  
15  
16 TGFBR2 mutations result in up-regulation of TGF-β signalling and lead to  
17  
18 extracellular matrix deposition and matrix degradation, which represent critical steps  
19  
20 in AA or AD <sup>33</sup>.

21  
22  
23  
24  
25  
26  
27  
28  
29 Low-dose steroids, such as prednisone, may be used to treat SS-induced joint and  
30  
31 muscle pain. Prolonged or high-dose corticosteroid treatment likely causes  
32  
33 disintegration of connective tissue of the media possibly together with primary aortic  
34  
35 wall involvement and/or vascular damage in patients with autoimmune disorders,  
36  
37 which can result in aortic aneurysmal enlargement and AD <sup>29 34</sup>. In this study, the  
38  
39 medical condition of steroids was matched. Therefore, the effect of steroids was  
40  
41 mitigated. The strength of our study involves its population-based database design. We  
42  
43 accounted for several aneurysm-related confounding factors. Although we adjusted  
44  
45 the results extensively using multivariate logistic regression models, there were  
46  
47 several limitations and unmeasured confounders in our study. The NHIRD registry is  
48  
49  
50  
51  
52  
53  
54  
55  
56  
57  
58  
59  
60



1  
2  
3  
4 not able to provide detailed information on laboratory results, family histories and  
5  
6 health-related lifestyle factors, such as alcohol consumption and tobacco use, which  
7  
8 can increase the risk of AA/AD and were potential confounding factors in this study.  
9  
10  
11  
12 In our study, we also considered COPD incidence as a proxy variable for tobacco use  
13  
14 to eliminate its potential confounding effect <sup>35</sup>. Although our study identified the  
15  
16 association between SS and AA/AD, the cohort study design did not enable  
17  
18 determination of the cause-effect relationship. Further prospective follow-up studies,  
19  
20 mechanistic studies and animal experiments should be performed.  
21  
22  
23  
24  
25  
26  
27  
28

## 29 **Conclusion**

30  
31 Patients with SS exhibit an increased risk for developing AA and AD, and  
32  
33 healthcare professionals should be aware of this risk when treating patients with SS.  
34  
35  
36 Increased aortic surveillance may be required in patients with SS.  
37  
38  
39  
40  
41  
42

## 43 **Author contributions**

44  
45 Y-DT, J-CW, and S-HT conceived and designed the study.  
46  
47

48  
49 W-CC provided the materials for the study. C-HC and S-JC analysed the data. C-JY  
50  
51 and M-TL contributed reagents, materials and analysis tools. Y-DT, J-CW, W-IL and  
52  
53 S-HT wrote the manuscript. All the authors approved the manuscript.  
54  
55  
56  
57  
58  
59  
60

**Competing interests**

None declared.

**Data sharing statement**

No additional data sharing available.

**Acknowledgements**

This study was supported by grants from Tri-Service General Hospital, National Defense Medical Center, Taipei, Taiwan (TSGH-C105-058); Tri-Service General Hospital, National Defense Medical Center, Taipei, Taiwan (TSGH-C105-173); Taoyuan Armed Forces General Hospital, Taoyuan, Taiwan (10514); and the Ministry of Science and Technology (MOST 106-2314-B-016 -008 -MY3).

**Legends to tables and figures**

Table 1. Characteristics of the study participants at baseline

Table 2. Incidences of aortic aneurysm and dissection and other characteristics during the ten-year follow-up period

Table 3. Factors associated with aortic aneurysm and dissection according to Cox regression

Table 4. Factors associated with aortic aneurysm and dissection stratified by primary/secondary SS using Cox regression

Figure 1. Patient selection flowchart

Figure 2. Kaplan-Meier curve of the cumulative risk of aortic aneurysm and dissection due to Sjögren's syndrome

## References

1. Vitali C, Bombardieri S, Jonsson R, et al. Classification criteria for Sjogren's syndrome: a revised version of the European criteria proposed by the American-European Consensus Group. *Annals of the rheumatic diseases* 2002;61(6):554-8.
2. Mavragani CP, Moutsopoulos HM. The geoepidemiology of Sjogren's syndrome. *Autoimmun Rev* 2010;9(5):A305-10. doi: 10.1016/j.autrev.2009.11.004
3. Howard DP, Banerjee A, Fairhead JF, et al. Population-based study of incidence and outcome of acute aortic dissection and premorbid risk factor control: 10-year results from the Oxford Vascular Study. *Circulation* 2013;127(20):2031-7. doi: 10.1161/CIRCULATIONAHA.112.000483
4. Olsson C, Thelin S, Stahle E, et al. Thoracic aortic aneurysm and dissection: increasing prevalence and improved outcomes reported in a nationwide population-based study of more than 14,000 cases from 1987 to 2002. *Circulation* 2006;114(24):2611-8. doi: 10.1161/CIRCULATIONAHA.106.630400
5. Yeh TY, Chen CY, Huang JW, et al. Epidemiology and medication utilization pattern of aortic dissection in Taiwan: A population-based study. *Medicine (Baltimore)* 2015;94(36):e1522. doi: 10.1097/MD.0000000000001522

- 1  
2  
3  
4 6. Shovman O, Tiosano S, Comaneshter D, et al. Aortic aneurysm associated with  
5  
6 rheumatoid arthritis: a population-based cross-sectional study. *Clinical*  
7  
8  
9 *rheumatology* 2016;35(11):2657-61. doi: 10.1007/s10067-016-3372-0  
10  
11  
12 [published Online First: 2016/08/10]  
13  
14  
15 7. Guy A, Tiosano S, Comaneshter D, et al. Aortic aneurysm association with SLE - a  
16  
17 case-control study. *Lupus* 2016;25(9):959-63. doi:  
18  
19  
20 10.1177/0961203316628999 [published Online First: 2016/01/27]  
21  
22  
23 8. Juarez M, Toms TE, de Pablo P, et al. Cardiovascular risk factors in women with  
24  
25 primary Sjogren's syndrome: United Kingdom primary Sjogren's syndrome  
26  
27 registry results. *Arthritis care & research* 2014;66(5):757-64. [published  
28  
29  
30 Online First: 2014/05/31]  
31  
32  
33  
34 9. Garcia AB, Dardin LP, Minali PA, et al. Asymptomatic Atherosclerosis in Primary  
35  
36 Sjogren Syndrome: Correlation Between Low Ankle Brachial Index and  
37  
38 Autoantibodies Positivity. *Journal of clinical rheumatology : practical reports*  
39  
40  
41 *on rheumatic & musculoskeletal diseases* 2016;22(6):295-8. doi:  
42  
43  
44 10.1097/rhu.0000000000000413 [published Online First: 2016/08/25]  
45  
46  
47  
48 10. Chiang CH, Liu CJ, Chen PJ, et al. Primary Sjogren's syndrome and risk of  
49  
50  
51 ischemic stroke: a nationwide study. *Clinical rheumatology* 2014;33(7):931-7.  
52  
53  
54  
55 doi: 10.1007/s10067-014-2573-7 [published Online First: 2014/03/22]  
56  
57  
58  
59  
60

- 1  
2  
3  
4 11. Chiang CH, Liu CJ, Chen PJ, et al. Primary Sjogren's Syndrome and the Risk of  
5  
6 Acute Myocardial Infarction: A Nationwide Study. *Acta Cardiologica Sinica*  
7  
8  
9 2013;29(2):124-31. [published Online First: 2013/03/01]  
10  
11  
12 12. Soejima K, Nakamura H, Tamai M, et al. Activation of MKK4 (SEK1), JNK, and  
13  
14 c-Jun in labial salivary infiltrating T cells in patients with Sjogren's syndrome.  
15  
16 *Rheumatology international* 2007;27(4):329-33. doi:  
17  
18 10.1007/s00296-006-0229-x [published Online First: 2006/09/30]  
19  
20  
21  
22  
23 13. Nakamura H, Kawakami A, Yamasaki S, et al. Expression of mitogen activated  
24  
25 protein kinases in labial salivary glands of patients with Sjogren's syndrome.  
26  
27 *Annals of the rheumatic diseases* 1999;58(6):382-5. [published Online First:  
28  
29 1999/05/26]  
30  
31  
32  
33  
34 14. Ito S, Ozawa K, Zhao J, et al. Olmesartan inhibits cultured rat aortic smooth  
35  
36 muscle cell death induced by cyclic mechanical stretch through the inhibition  
37  
38 of the c-Jun N-terminal kinase and p38 signaling pathways. *Journal of*  
39  
40 *pharmacological sciences* 2015;127(1):69-74. doi: 10.1016/j.jphs.2014.11.002  
41  
42  
43  
44  
45  
46 15. Zhang Y, Naggar JC, Welzig CM, et al. Simvastatin inhibits angiotensin  
47  
48 II-induced abdominal aortic aneurysm formation in apolipoprotein E-knockout  
49  
50 mice: possible role of ERK. *Arteriosclerosis, thrombosis, and vascular biology*  
51  
52 2009;29(11):1764-71. doi: 10.1161/ATVBAHA.109.192609  
53  
54  
55  
56  
57  
58  
59  
60

- 1  
2  
3  
4 16. Cheng CL, Kao YH, Lin SJ, et al. Validation of the National Health Insurance  
5  
6 Research Database with ischemic stroke cases in Taiwan.  
7  
8  
9 *Pharmacoepidemiology and drug safety* 2011;20(3):236-42. doi:  
10  
11  
12 10.1002/pds.2087 [published Online First: 2011/02/26]  
13  
14  
15 17. Mao CT, Tsai ML, Wang CY, et al. Outcomes and characteristics of patients  
16  
17 undergoing percutaneous angioplasty followed by below-knee or above-knee  
18  
19 amputation for peripheral artery disease. *PloS one* 2014;9(10):e111130. doi:  
20  
21  
22 10.1371/journal.pone.0111130  
23  
24  
25  
26 18. Valim V, Gerdts E, Jonsson R, et al. Atherosclerosis in Sjogren's syndrome:  
27  
28 evidence, possible mechanisms and knowledge gaps. *Clinical and*  
29  
30 *experimental rheumatology* 2016;34(1):133-42. [published Online First:  
31  
32 2016/01/27]  
33  
34  
35  
36  
37 19. Singh AG, Singh S, Matteson EL. Rate, risk factors and causes of mortality in  
38  
39 patients with Sjogren's syndrome: a systematic review and meta-analysis of  
40  
41 cohort studies. *Rheumatology (Oxford, England)* 2016;55(3):450-60. doi:  
42  
43  
44 10.1093/rheumatology/kev354  
45  
46  
47  
48  
49 20. Sezis Demirci M, Karabulut G, Gungor O, et al. Is There an Increased Arterial  
50  
51 Stiffness in Patients with Primary Sjogren's Syndrome? *Intern Med*  
52  
53  
54 2016;55(5):455-9. doi: 10.2169/internalmedicine.55.3472 [published Online  
55  
56  
57  
58  
59  
60

1  
2  
3  
4 First: 2016/03/05]  
5

- 6  
7 21. Sawada H, Hao H, Naito Y, et al. Aortic iron overload with oxidative stress and  
8  
9 inflammation in human and murine abdominal aortic aneurysm.  
10  
11 *Arteriosclerosis, thrombosis, and vascular biology* 2015;35(6):1507-14. doi:  
12  
13 10.1161/atvbaha.115.305586 [published Online First: 2015/04/18]  
14  
15  
16  
17 22. Vadacca M, Margiotta D, Sambataro D, et al. [BAFF/APRIL pathway in Sjogren  
18  
19 syndrome and systemic lupus erythematosus: relationship with chronic  
20  
21 inflammation and disease activity]. *Reumatismo* 2010;62(4):259-65.  
22  
23  
24  
25  
26 23. Cifani N, Proietta M, Tritapepe L, et al. Stanford-A acute aortic dissection,  
27  
28 inflammation, and metalloproteinases: a review. *Annals of medicine*  
29  
30 2015;47(6):441-6. doi: 10.3109/07853890.2015.1073346  
31  
32  
33  
34 24. Eagleton MJ. Inflammation in abdominal aortic aneurysms: cellular infiltrate and  
35  
36 cytokine profiles. *Vascular* 2012;20(5):278-83. doi:  
37  
38 10.1258/vasc.2011.201207  
39  
40  
41  
42  
43 25. Nocturne G, Mariette X. Advances in understanding the pathogenesis of primary  
44  
45 Sjogren's syndrome. *Nat Rev Rheumatol* 2013;9(9):544-56. doi:  
46  
47 10.1038/nrrheum.2013.110  
48  
49  
50  
51 26. Wu AJ, Lafrenie RM, Park C, et al. Modulation of MMP-2 (gelatinase A) and  
52  
53 MMP-9 (gelatinase B) by interferon-gamma in a human salivary gland cell  
54  
55  
56  
57  
58  
59  
60



- 1  
2  
3  
4 line. *Journal of cellular physiology* 1997;171(2):117-24. doi:  
5  
6 10.1002/(sici)1097-4652(199705)171:2<117::aid-jcp1>3.0.co;2-r [published  
7  
8  
9 Online First: 1997/05/01]  
10  
11  
12 27. Hulkkonen J, Pertovaara M, Antonen J, et al. Matrix metalloproteinase 9 (MMP-9)  
13  
14 gene polymorphism and MMP-9 plasma levels in primary Sjogren's syndrome.  
15  
16 *Rheumatology (Oxford, England)* 2004;43(12):1476-9. doi:  
17  
18 10.1093/rheumatology/keh369 [published Online First: 2004/08/19]  
19  
20  
21  
22  
23 28. Dale MA, Suh MK, Zhao S, et al. Background differences in baseline and  
24  
25 stimulated MMP levels influence abdominal aortic aneurysm susceptibility.  
26  
27 *Atherosclerosis* 2015;243(2):621-9. doi: 10.1016/j.atherosclerosis.2015.10.006  
28  
29  
30  
31  
32 29. Amalinei C, Caruntu ID, Giusca SE, et al. Matrix metalloproteinases involvement  
33  
34 in pathologic conditions. *Romanian journal of morphology and embryology =*  
35  
36 *Revue roumaine de morphologie et embryologie* 2010;51(2):215-28.  
37  
38 [published Online First: 2010/05/25]  
39  
40  
41  
42  
43 30. Zoukhri D, Macari E, Choi SH, et al. c-Jun NH2-terminal kinase mediates  
44  
45 interleukin-1beta-induced inhibition of lacrimal gland secretion. *Journal of*  
46  
47 *neurochemistry* 2006;96(1):126-35. doi: 10.1111/j.1471-4159.2005.03529.x  
48  
49  
50  
51 [published Online First: 2005/11/23]  
52  
53  
54  
55 31. Tsai SH, Huang PH, Peng YJ, et al. Zoledronate attenuates angiotensin II-induced  
56  
57  
58  
59  
60

- 1  
2  
3  
4 abdominal aortic aneurysm through inactivation of Rho/ROCK-dependent  
5  
6 JNK and NF-kappaB pathway. *Cardiovasc Res* 2013;100(3):501-10. doi:  
7  
8  
9 10.1093/cvr/cvt230  
10  
11  
12 32. Hall BE, Zheng C, Swaim WD, et al. Conditional overexpression of TGF-beta1  
13  
14 disrupts mouse salivary gland development and function. *Laboratory*  
15  
16 *investigation; a journal of technical methods and pathology*  
17  
18 2010;90(4):543-55. doi: 10.1038/labinvest.2010.5 [published Online First:  
19  
20 2010/02/10]  
21  
22  
23  
24  
25  
26 33. Jones JA, Spinale FG, Ikonomidis JS. Transforming growth factor-beta signaling  
27  
28 in thoracic aortic aneurysm development: a paradox in pathogenesis. *J Vasc*  
29  
30 *Res* 2009;46(2):119-37. doi: 10.1159/000151766  
31  
32  
33  
34 34. Sholter DE, Armstrong PW. Adverse effects of corticosteroids on the  
35  
36 cardiovascular system. *The Canadian journal of cardiology*  
37  
38 2000;16(4):505-11.  
39  
40  
41  
42  
43 35. Yu TM, Chuang YW, Yu MC, et al. Risk of cancer in patients with polycystic  
44  
45 kidney disease: a propensity-score matched analysis of a nationwide,  
46  
47 population-based cohort study. *Lancet Oncol* 2016;17(10):1419-25. doi:  
48  
49 10.1016/S1470-2045(16)30250-9  
50  
51  
52  
53  
54  
55  
56  
57  
58  
59  
60

1  
2  
3  
4  
5  
6  
7  
8  
9  
10  
11  
12  
13  
14  
15  
16  
17  
18  
19  
20  
21  
22  
23  
24  
25  
26  
27  
28  
29  
30  
31  
32  
33  
34  
35  
36  
37  
38  
39  
40  
41  
42  
43  
44  
45  
46  
47  
48  
49  
50  
51  
52  
53  
54  
55  
56  
57  
58  
59  
60

For peer review only

Table 1 Characteristics of the study participants at baseline

| Sjögren's syndrome       | Total<br>N (%)  | With<br>N (%)   | Without<br>N (%) | P-value |
|--------------------------|-----------------|-----------------|------------------|---------|
| Total                    | 54,705          | 10,941 (20.00%) | 43,764(80.00%)   |         |
| Gender                   |                 |                 |                  | 0.999   |
| Male                     | 10,187 (18.63%) | 2,011 (18.44%)  | 8,176 (18.68%)   |         |
| Female                   | 44,485 (81.37%) | 8,897 (81.56%)  | 35,588 (81.32%)  |         |
| Age (years)              | 55.78±17.09     | 55.80±16.65     | 55.77±17.20      | 0.897   |
| DM                       | 3,553 (6.49%)   | 724 (6.62%)     | 2,829 (6.46%)    | 0.558   |
| Hypertension             | 8,091 (14.79%)  | 1,578 (14.42%)  | 6,513 (14.88%)   | 0.228   |
| Hyperlipidaemia          | 1,145 (2.09%)   | 234 (2.14%)     | 911 (2.08%)      | 0.709   |
| Behcet's disease         | 321 (0.59%)     | 62 (0.57%)      | 259 (0.59%)      | 0.834   |
| Giant cell arteritis     | 15 (0.03%)      | 3 (0.03%)       | 12 (0.03%)       | 0.999   |
| Rheumatoid arthritis     | 8,907 (16.28%)  | 1,784 (16.31%)  | 7,123 (16.28)    | 0.942   |
| Relapsing polychondritis | 71 (0.13%)      | 14 (0.13%)      | 57 (0.13%)       | 0.953   |
| Takayasu's arteritis     | 15 (0.03%)      | 3 (0.03%)       | 12 (0.03%)       | 0.999   |
| COPD                     | 2,931 (5.36%)   | 581 (5.3%)      | 2,350 (5.37%)    | 0.831   |
| Steroid                  | 16,799 (30.71%) | 3,345 (30.57%)  | 13,454 (30.74%)  | 0.737   |
| β blocker                | 12,588 (23.01%) | 2,513 (22.97%)  | 10,075 (23.02%)  | 0.919   |
| CCB                      | 11,553 (21.12%) | 2,342 (21.41%)  | 9,211 (21.05%)   | 0.409   |
| ACEI                     | 13,586 (24.84%) | 2,711 (24.78%)  | 10,875 (24.85%)  | 0.878   |
| ARB                      | 12,718 (23.25%) | 2,620 (23.95%)  | 10,098 (23.07%)  | 0.054   |
| Diuretic                 | 12,440 (22.74%) | 2,429 (22.20%)  | 10,011 (22.87%)  | 0.136   |
| Statin                   | 13,922 (25.45%) | 2,811 (25.69%)  | 11,111 (25.39%)  | 0.516   |

P-value (categorical variable: chi-square/Fisher's exact test; continuous variable: t-test)

DM = diabetes mellitus; COPD = chronic obstructive pulmonary disease; CCB = calcium channel blocker; ACEI = angiotensin-converting enzyme inhibitor; ARB = angiotensin receptor blocker

Table 2 Incidences of aortic aneurysm and dissection and other characteristics during the ten-year follow-up period

| Sjögren's syndrome                    | Total<br>N (%)  | With<br>N (%)  | Without<br>N (%) | P-value |
|---------------------------------------|-----------------|----------------|------------------|---------|
| <b>Total</b>                          | 54,705          | 10,941(20.00%) | 43,764(80.00%)   |         |
| <b>Aortic aneurysm and dissection</b> | 207 (0.38%)     | 47(0.43%)      | 160(0.37%)       | 0.045   |
| <b>Gender</b>                         |                 |                |                  | 0.999   |
| Male                                  | 10,187 (18.63%) | 2,011(18.44%)  | 8,176(18.68%)    |         |
| Female                                | 44,485 (81.37%) | 8,897(81.56%)  | 35,588(81.32%)   |         |
| <b>Age (years)</b>                    | 61.36±5.41      | 60.90±4.98     | 61.47±5.51       | <0.001  |
| <b>DM</b>                             | 7,603 (13.90%)  | 846(7.73%)     | 6,757(15.44%)    | <0.001  |
| <b>Hypertension</b>                   | 8,821 (16.12%)  | 1,708(15.61%)  | 7,113(16.25%)    | 0.102   |
| <b>Hyperlipidaemia</b>                | 1,128 (2.06%)   | 240(2.19%)     | 888(2.03%)       | 0.279   |
| <b>Behcet's disease</b>               | 324 (0.59%)     | 63(0.58%)      | 261(0.60%)       | 0.802   |
| <b>Giant cell arteritis</b>           | 16 (0.03%)      | 3(0.03%)       | 13(0.03%)        | 0.901   |
| <b>Rheumatoid arthritis</b>           | 9,033 (16.51%)  | 1,774(16.21%)  | 7,259(16.59%)    | 0.348   |
| <b>Relapsing polychondritis</b>       | 80 (0.15%)      | 19 (0.17%)     | 61 (0.14%)       | 0.401   |
| <b>Takayasu's arteritis</b>           | 15 (0.03%)      | 3 (0.03%)      | 12 (0.03%)       | 0.999   |
| <b>COPD</b>                           | 3,593 (6.57%)   | 652 (5.96%)    | 2,941 (6.72%)    | 0.004   |
| <b>CCI_R</b>                          | 0.78±1.53       | 0.83±1.39      | 0.77±1.56        | <0.001  |
| <b>Steroid</b>                        | 17,112 (31.28%) | 3,511 (32.09%) | 13,601 (31.08%)  | 0.041   |
| <b>β blockers</b>                     | 13,750 (25.13%) | 2,674 (24.44%) | 11,076 (25.31%)  | 0.061   |
| <b>CCB</b>                            | 11,833 (21.63%) | 2,397 (21.91%) | 9,436 (21.56%)   | 0.430   |
| <b>ACEI</b>                           | 13,793 (25.21%) | 2,784 (25.45%) | 11,009 (25.16%)  | 0.532   |
| <b>ARB</b>                            | 12,976 (23.72%) | 2,681 (24.50%) | 10,295 (23.52%)  | 0.031   |
| <b>Diuretic</b>                       | 12,692 (23.20%) | 2,507 (22.91%) | 10,185 (23.27%)  | 0.427   |
| <b>Statin</b>                         | 14,123 (25.82%) | 2,828 (25.85%) | 11,295 (25.81%)  | 0.934   |

P-value (categorical variable: chi-square/Fisher's exact test; continuous variable: t-test)

CCI\_R = Charlson comorbidity index removed DM, COPD; DM = diabetes mellitus; COPD = chronic obstructive pulmonary disease; CCB = calcium channel blocker; ACEI = angiotensin-converting enzyme inhibitor; ARB = angiotensin receptor blocker

Table 3 Factors associated with aortic aneurysm and dissection according to Cox regression

| Variables            | Crude HR | 95% CI      | P      | Adjusted HR | 95% CI      | P      |
|----------------------|----------|-------------|--------|-------------|-------------|--------|
| Sjögren's syndrome   | 3.205    | 2.254-3.565 | <0.001 | 3.642       | 2.527-5.250 | <0.001 |
| Gender (male)        | 2.645    | 1.974-3.597 | <0.001 | 2.035       | 1.534-2.700 | <0.001 |
| Age (years)          | 1.049    | 1.032-1.057 | <0.001 | 1.043       | 1.032-1.055 | <0.001 |
| DM                   | 1.704    | 1.389-1.944 | 0.024  | 1.674       | 1.065-1.976 | 0.037  |
| Hypertension         | 1.165    | 1.022-1.454 | 0.038  | 1.305       | 0.973-1.751 | 0.075  |
| Hyperlipidaemia      | 1.211    | 0.594-2.436 | 0.618  | 1.343       | 0.656-2.751 | 0.420  |
| Rheumatoid arthritis | 1.645    | 0.774-3.496 | 0.196  | 0.801       | 0.362-1.769 | 0.583  |
| COPD                 | 1.838    | 1.256-2.691 | 0.002  | 1.170       | 0.790-1.735 | 0.433  |
| CCI_R                | 1.036    | 0.945-1.087 | 0.074  | 1.016       | 0.968-1.065 | 0.527  |
| Steroid              | 1.497    | 0.598-2.976 | 0.495  | 1.501       | 0.339-3.298 | 0.617  |
| $\beta$ blockers     | 1.468    | 0.453-2.772 | 0.862  | 1.398       | 0.401-2.895 | 0.803  |
| CCB                  | 1.345    | 0.343-2.901 | 0.372  | 1.402       | 0.452-2.806 | 0.280  |
| ACEI                 | 1.298    | 0.426-3.041 | 0.601  | 1.288       | 0.395-2.845 | 0.334  |
| ARB                  | 1.346    | 0.379-1.986 | 0.711  | 1.345       | 0.343-1.886 | 0.682  |
| Diuretic             | 1.198    | 0.598-2.511 | 0.652  | 1.201       | 0.490-2.907 | 0.703  |
| Statin               | 1.364    | 0.667-4.972 | 0.798  | 1.335       | 0.679-4.787 | 0.897  |

HR= hazard ratio; CI = confidence interval; Adjusted HR: adjusted variables listed in the table;

CCI\_R = Charlson comorbidity index removed DM, COPD; DM = diabetes mellitus; COPD = chronic obstructive pulmonary disease; CCB = calcium channel blocker; ACEI = angiotensin-converting enzyme inhibitor; ARB = angiotensin receptor blocker

1  
2  
3  
4  
5  
6  
7  
8  
9  
10  
11  
12  
13  
14  
15  
16  
17  
18  
19  
20  
21  
22  
23  
24  
25  
26  
27  
28  
29  
30  
31  
32  
33  
34  
35  
36  
37  
38  
39  
40  
41  
42  
43  
44  
45  
46  
47

**Table 4. Factors associated with aortic aneurysm and dissection stratified by primary/secondary Sjögren's syndrome using Cox regression**

|                            | Patients with Sjögren's syndrome |           |                                            | Patients without Sjögren's syndrome |            |                                            | Ratio | Adjusted HR* | 95% CI      | P-value |
|----------------------------|----------------------------------|-----------|--------------------------------------------|-------------------------------------|------------|--------------------------------------------|-------|--------------|-------------|---------|
|                            | Events                           | PY        | Incidence rate<br>(per 10 <sup>5</sup> PY) | Events                              | PY         | Incidence rate<br>(per 10 <sup>5</sup> PY) |       |              |             |         |
| Total                      | 47                               | 55,860.08 | 84.14                                      | 160                                 | 253,779.88 | 63.05                                      | 1.335 | 3.642        | 2.527-5.250 | <0.001  |
| Without RA / SLE / SS /PBC | 30                               | 36,607.55 | 81.95                                      | 158                                 | 248,694.36 | 63.53                                      | 1.290 | 1.753        | 1.108-9.382 | 0.042   |
| With RA / SLE / SS /PBC    | 17                               | 19,252.53 | 88.30                                      | 2                                   | 5,085.52   | 39.33                                      | 2.245 | 3.693        | 2.520-5.411 | <0.001  |

PYs = person-years; Ratio = incidence of patients with AA/AD divided by the incidence of patients without AA/AD; \*Adjusted HR = adjusted hazard ratio: adjusted for age, sex, comorbidities, and medications, as listed in Table 3, using Cox regression; CI = confidence interval; RA = rheumatoid arthritis ; SLE = systemic lupus erythematosus ; SS = systemic sclerosis ; PBC = primary biliary cirrhosis

Primary Sjögren's syndrome: Sjögren's syndrome without systemic lupus erythematosus, rheumatoid arthritis, systemic sclerosis, or primary biliary cirrhosis; Secondary Sjögren's syndrome: Sjögren's syndrome with systemic lupus erythematosus, rheumatoid arthritis , systemic sclerosis, or primary biliary cirrhosis

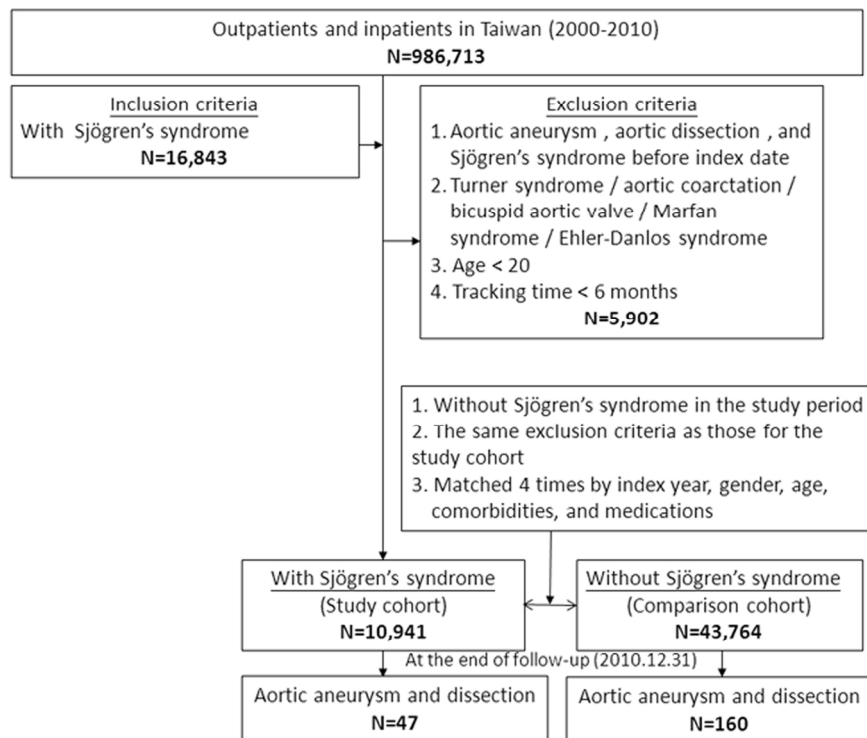

127x95mm (300 x 300 DPI)



1  
2  
3  
4  
5  
6  
7  
8  
9  
10  
11  
12  
13  
14  
15  
16  
17  
18  
19  
20  
21  
22  
23  
24  
25  
26  
27  
28  
29  
30  
31  
32  
33  
34  
35  
36  
37  
38  
39  
40  
41  
42  
43  
44  
45  
46  
47  
48  
49  
50  
51  
52  
53  
54  
55  
56  
57  
58  
59  
60

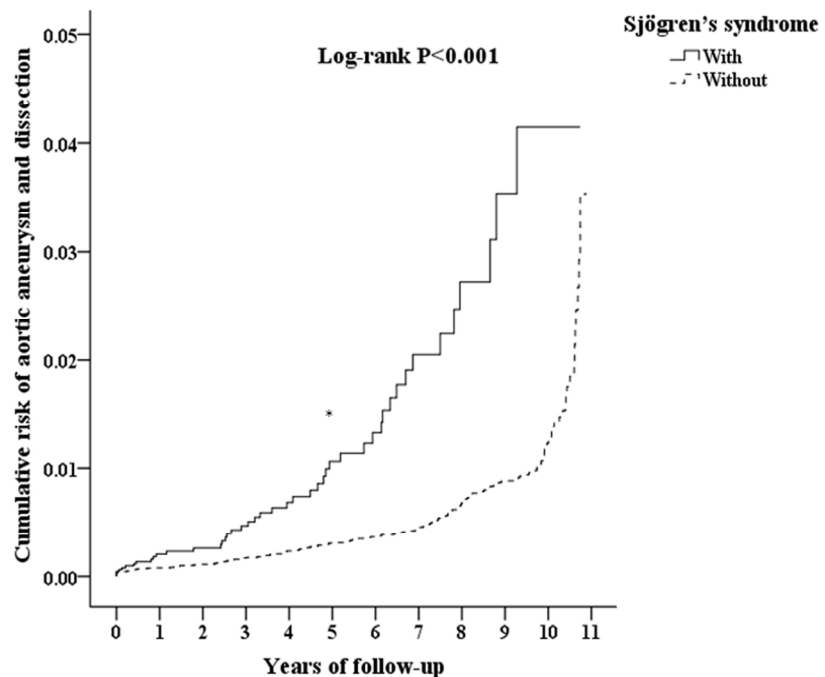

|                                              |       |       |       |       |       |       |       |        |        |        |        |
|----------------------------------------------|-------|-------|-------|-------|-------|-------|-------|--------|--------|--------|--------|
| <b>With Sjögren's syndrome (N=10,941)</b>    | 13    | 15    | 21    | 26    | 32    | 35    | 41    | 44     | 46     | 47     | 47     |
| <b>Without Sjögren's syndrome (N=43,764)</b> | 27    | 36    | 49    | 63    | 77    | 81    | 94    | 113    | 130    | 146    | 160    |
| <b>P value</b>                               | 0.897 | 0.513 | 0.275 | 0.102 | 0.036 | 0.015 | 0.001 | <0.001 | <0.001 | <0.001 | <0.001 |

\*P<0.05 is considered statistically significant

145x124mm (300 x 300 DPI)

Only

# BMJ Open

## Risk of aortic aneurysm and dissection in patients with Sjögren's syndrome: a nationwide population-based cohort study in Taiwan

|                                 |                                                                                                                                                                                                                                                                                                                                                                                                                                                                                                                                                                                                                                                                                                                                                                                                                                                                                                                                                                                                                                                                                                                                                                                                                                                                                                                                                                                 |
|---------------------------------|---------------------------------------------------------------------------------------------------------------------------------------------------------------------------------------------------------------------------------------------------------------------------------------------------------------------------------------------------------------------------------------------------------------------------------------------------------------------------------------------------------------------------------------------------------------------------------------------------------------------------------------------------------------------------------------------------------------------------------------------------------------------------------------------------------------------------------------------------------------------------------------------------------------------------------------------------------------------------------------------------------------------------------------------------------------------------------------------------------------------------------------------------------------------------------------------------------------------------------------------------------------------------------------------------------------------------------------------------------------------------------|
| Journal:                        | <i>BMJ Open</i>                                                                                                                                                                                                                                                                                                                                                                                                                                                                                                                                                                                                                                                                                                                                                                                                                                                                                                                                                                                                                                                                                                                                                                                                                                                                                                                                                                 |
| Manuscript ID                   | bmjopen-2018-022326.R1                                                                                                                                                                                                                                                                                                                                                                                                                                                                                                                                                                                                                                                                                                                                                                                                                                                                                                                                                                                                                                                                                                                                                                                                                                                                                                                                                          |
| Article Type:                   | Research                                                                                                                                                                                                                                                                                                                                                                                                                                                                                                                                                                                                                                                                                                                                                                                                                                                                                                                                                                                                                                                                                                                                                                                                                                                                                                                                                                        |
| Date Submitted by the Author:   | 30-May-2018                                                                                                                                                                                                                                                                                                                                                                                                                                                                                                                                                                                                                                                                                                                                                                                                                                                                                                                                                                                                                                                                                                                                                                                                                                                                                                                                                                     |
| Complete List of Authors:       | <p>Tsai, Yi-Da; Tri-Service General Hospital, National Defense Medical Center, Department of Emergency medicine</p> <p>Chien, Wu-Chien ; Tri-Service General Hospital, National Defense Medical Center, Department of Medical Research; National Defense Medical Center, School of Public Health</p> <p>Tsai, Shih-Hung ; Tri-Service General Hospital, National Defense Medical Center, Department of Emergency Medicine</p> <p>Chung, Chi-Hsiang; Tri-Service General Hospital, National Defense Medical Center, Department of Medical Research; National Defense Medical Center, School of Public Health</p> <p>Chu, Shi-Jye ; Tri-Service General Hospital, National Defense Medical Center, Division of Rheumatology, Immunology and Allergy, Department of Internal Medicine</p> <p>Chen, Sy-Jou ; Tri-Service General Hospital, National Defense Medical Center, Department of Emergency Medicine</p> <p>Liao, Wen-I; Tri-Service General Hospital, National Defense Medical Center, Department of Emergency Medicine</p> <p>Yang, Chih-Jen; Tri-Service General Hospital, National Defense Medical Center, Emergency Medicine</p> <p>Liao, Min-Tser ; Taoyuan Armed Forces General Hospital,, Department of Pediatrics</p> <p>Wang, Jen-Chun; Tri-Service General Hospital, National Defense Medical Center, department of Emergency Medicine, Emergency Department</p> |
| <b>Primary Subject Heading</b>: | Rheumatology                                                                                                                                                                                                                                                                                                                                                                                                                                                                                                                                                                                                                                                                                                                                                                                                                                                                                                                                                                                                                                                                                                                                                                                                                                                                                                                                                                    |
| Secondary Subject Heading:      | Cardiovascular medicine                                                                                                                                                                                                                                                                                                                                                                                                                                                                                                                                                                                                                                                                                                                                                                                                                                                                                                                                                                                                                                                                                                                                                                                                                                                                                                                                                         |
| Keywords:                       | Sjögren's syndrome, aortic dissection, aortic aneurysm                                                                                                                                                                                                                                                                                                                                                                                                                                                                                                                                                                                                                                                                                                                                                                                                                                                                                                                                                                                                                                                                                                                                                                                                                                                                                                                          |
|                                 |                                                                                                                                                                                                                                                                                                                                                                                                                                                                                                                                                                                                                                                                                                                                                                                                                                                                                                                                                                                                                                                                                                                                                                                                                                                                                                                                                                                 |

SCHOLARONE™  
Manuscripts

1  
2  
3  
4 **1 Increased risk of aortic aneurysm and dissection in patients with Sjögren's**  
5  
6 **2 syndrome: a nationwide population-based cohort study in Taiwan**  
7  
8  
9  
10 **3**

11  
12 4 Yi-Da Tsai MD<sup>1</sup>, Wu-Chien Chien PhD<sup>2,3</sup>, Shih-Hung Tsai MD, PhD<sup>1</sup>, Chi-Hsiang  
13  
14  
15 5 Chung PhD<sup>2,3,4</sup>, Shi-Jye Chu MD<sup>5</sup>, Sy-Jou Chen MD, MS<sup>1,6</sup>, Wen-I Liao MD<sup>1</sup>,  
16  
17  
18 6 Chih-Jen Yang MD<sup>1</sup>, Min-Tser Liao, MD<sup>7</sup>, Jen-Chun Wang MD<sup>1,8,\*</sup>  
19  
20  
21  
22

23 8 <sup>1</sup>Department of Emergency Medicine, Tri-Service General Hospital, National Defense  
24  
25  
26 9 Medical Center, Taipei, Taiwan  
27  
28

29 10 <sup>2</sup>Department of Medical Research, Tri-Service General Hospital, National Defense  
30  
31  
32 11 Medical Center  
33  
34

35 12 <sup>3</sup>School of Public Health, National Defense Medical Center, Taipei, Taiwan  
36  
37

38 13 <sup>4</sup>Taiwanese Injury Prevention and Safety Promotion Association, Taipei, Taiwan  
39  
40

41 14 <sup>5</sup>Division of Rheumatology, Immunology and Allergy, Department of Internal Medicine,  
42  
43 15 Tri-Service General Hospital, National Defense Medical Center, Taipei, Taiwan  
44  
45

46 16 <sup>6</sup>Graduate Institute of Injury Prevention and Control, College of Public Health and  
47  
48  
49 17 Nutrition, Taipei Medical University, Taipei, Taiwan  
50  
51

52 18 <sup>7</sup>Department of Pediatrics, Taoyuan Armed Forces General Hospital, Taoyuan, Taiwan  
53  
54

55 19 <sup>8</sup>Institute of Clinical Medicine, National Yang-Ming University, Taipei, Taiwan  
56  
57  
58  
59  
60

1  
2  
3  
4 \*Corresponding author:  
5

6  
7 **Dr. Jen-Chun Wang**  
8

9  
10 Department of Emergency Medicine,  
11

12 Tri-Service General Hospital, National Defense Medical Center, Taipei, Taiwan  
13

14  
15 No. 325, Sec. 2, Cheng-Kung Road, Neihu Dist., Taipei City 11490, Taiwan  
16

17  
18 E-mail: royalflushwang@gmail.com  
19

20  
21 Tel.: + 886-2-87923311-16877;  
22

23  
24 Fax: + 886-2-87927034  
25

26  
27 9  
28

29  
30 Word count:  
31

32  
33 2602  
34  
35  
36  
37  
38  
39  
40  
41  
42  
43  
44  
45  
46  
47  
48  
49  
50  
51  
52  
53  
54  
55  
56  
57  
58  
59  
60

1  
2  
3  
4 **1 ABSTRACT**

5  
6 **2 Objectives:** Sjögren's syndrome (SS) is a systemic autoimmune disorder. Several  
7  
8  
9  
10  
11  
12  
13  
14  
15  
16  
17  
18  
19  
20  
21  
22  
23  
24  
25  
26  
27  
28  
29  
30  
31  
32  
33  
34  
35  
36  
37  
38  
39  
40  
41  
42  
43  
44  
45  
46  
47  
48  
49  
50  
51  
52  
53  
54  
55  
56  
57  
58  
59  
60  
3  
molecular pathways and the activation of matrix metalloproteinases associated with  
the pathogenesis of SS participate in the initiation and progression of aortic aneurysm  
(AA) and aortic dissection (AD). In this study, we aimed to evaluate whether patients  
with SS exhibit an increased risk of AA or AD.

**7 Methods:** We conducted a retrospective cohort study using a database extracted from  
8 Taiwan's National Health Insurance Research Database (NHIRD). All medical  
9 conditions for each case and control were categorized using the International  
10 Classification of Diseases, 9<sup>th</sup> Revision (ICD-9). Hazard ratios (HRs) and 95%  
11 confidence intervals (CIs) for associations between SS and AA/AD were estimated  
12 using Cox regression and adjusted for co-morbidities.

**13 Results:** Our analyses included 10,941 SS cases and 43,764 propensity score-matched  
14 controls. Compared with the controls, the patients with SS exhibited a significantly  
15 increased risk of developing an AA or AD (adjusted HR = 3.642, P < 0.001).

16 Subgroup analysis revealed that compared with patients without SS, patients with  
17 primary and secondary SS both exhibited a significantly increased risk of developing  
18 AA or AD (adjusted HR = 1.753, P = 0.042; adjusted HR = 3.693, P < 0.001).

**19 Conclusion:** Patients with SS exhibit increased risks of developing AA or AD, and

1  
2  
3  
4 1 healthcare professionals should be aware of this risk when treating patients with SS.  
5

6  
7 2 Increased aortic surveillance may be required for patients with SS syndrome.  
8

9  
10 3

11  
12 4 **Keywords:** Sjögren's syndrome, aortic dissection, aortic aneurysm  
13

14  
15 5  
16  
17  
18  
19  
20  
21  
22  
23  
24  
25  
26  
27  
28  
29  
30  
31  
32  
33  
34  
35  
36  
37  
38  
39  
40  
41  
42  
43  
44  
45  
46  
47  
48  
49  
50  
51  
52  
53  
54  
55  
56  
57  
58  
59  
60

For peer review only

## 1    **STRENGTHS AND LIMITATIONS OF THIS STUDY**

- 2    ●    The strength of our study is its population-based cohort design with a large  
3  
4    sample size.
- 5  
6    ●    The patients and controls were selected by 1:4 matching according to the  
7  
8    following baseline variables: age; sex; co-morbidities; and medications used.  
9  
10    This population-based cohort study was adjusted for potential risk factors to  
11  
12    minimize study bias.
- 13    ●    This was a retrospective cohort study.
- 14  
15    ●    NHIRD cannot provide detailed information regarding the laboratory results  
16  
17    or lifestyle factors of the patients.
- 18  
19    ●    Our results are limited to human data. Both mechanistic and animal studies are  
20  
21    required for further clarification.  
22  
23  
24  
25  
26  
27  
28  
29  
30  
31  
32  
33  
34  
35  
36  
37  
38  
39  
40  
41  
42  
43  
44  
45  
46  
47  
48  
49  
50  
51  
52  
53  
54  
55  
56  
57  
58  
59  
60

## 1 INTRODUCTION

2 Sjögren's syndrome (SS) is a systemic autoimmune disorder commonly  
3 presenting with dry eyes and mouth. The prevalence of SS is between 0.1% and 4.8%  
4 in various populations when strictly defined according to the American-European  
5 Consensus Criteria, and it is one of the most common autoimmune diseases.[1] SS  
6 may affect patients at any age, but more cases occur in the fourth decade of life, and  
7 there is a female predominance. The female-male ratio is approximately 9:1.[2] Aortic  
8 aneurysms (AAs) are often diagnosed inadvertently and are a common cause of  
9 sudden death. Enlarged aneurysms can result in rupture. Aortic dissection (AD) is one  
10 of the deadliest complications of thoracic aortic disease. Estimates of the incidence of  
11 AD range from 6 cases per 100,000 to 16.3 per 100,000 in England and Sweden,  
12 respectively.[3,4] Regarding the Asian population, the average annual incidence of  
13 AD is 5.6 per 100,000 persons in Taiwan and the prevalence is 19.9 per 100,000  
14 persons, with a predominance noted among men 50 to 54 years of age (27.3 per  
15 100,000 persons per year).[5]

16 Previous studies have demonstrated that AA is more prevalent in patients with  
17 rheumatoid arthritis (RA) and systemic lupus erythematosus (SLE) compared with the  
18 general population.[6,7] Compared with age- and sex-matched healthy controls,  
19 primary SS (PSS) patients exhibited a 2-fold increased prevalence of hypertension



1 and hypertriglyceridemia. Furthermore, hypertension is underdiagnosed and  
2 suboptimally treated in PSS.[8] SS with positive autoantibodies is associated with a  
3 low ankle-brachial index, which may indicate an increased risk of early  
4 atherosclerosis.[9] Nonetheless, previous population-based studies indicated that SS is  
5 not associated with an increased risk of subsequent acute myocardial infarction (AMI)  
6 and ischaemic stroke.[10,11]

7       Several molecular mechanisms, including JNK, NF- $\kappa$ B and TGF- $\beta$  signalling  
8 pathways, and matrix metalloproteinase (MMP) activation are associated with the  
9 pathogenesis of SS.[12,13] These molecular mechanisms also actively participate in  
10 the initiation and progression of AA or AD.[14,15] Based on these findings, we  
11 hypothesized that patients with SS may have an increased risk of AA or AD due to  
12 SS-related cardiovascular risks and shared molecular mechanisms. However, the  
13 association between SS and AA or AD has not been thoroughly evaluated in  
14 large-scale studies. Therefore, we aimed to determine whether SS patients exhibited  
15 an increased risk of AA or AD using a nationwide healthcare insurance claim  
16 database.

## 17 **METHODS**

### 18 **Data source**

1           The data described herein were acquired from the Longitudinal Health Insurance  
2  
3  
4           Database 2005 (LHID 2005), a subgroup database of the Taiwan National Health  
5  
6           Insurance Research Database (NHIRD) used for the nationwide population-based  
7  
8           retrospective cohort study. The National Health Insurance programme in Taiwan  
9  
10          provides health care for 99% of the population (greater than 23 million people) and  
11  
12          was implemented in 1995. The LHID 2005 provides information on medical service  
13  
14          utilization using a randomly selected sample of approximately one million people  
15  
16          receiving benefits, representing approximately 5% of Taiwan’s population in 2005.  
17  
18          The information was obtained from the NHIRD between 2000 and 2010. The  
19  
20          accuracy of the diagnoses in the NHIRD, particularly the diagnoses of major diseases  
21  
22          (e.g., acute coronary syndrome and stroke), has been corroborated.[16,17] The LHID  
23  
24          is composed of “de-identified” secondary data that are available to the public via open  
25  
26          access for research. ICD-9-CM (International Classification of Diseases, 9th Revision,  
27  
28          Clinical Modification) diagnostic and procedure codes (up to five each), sex,  
29  
30          birthdays, patient identification numbers, dates of admission and discharge, and  
31  
32          outcomes are coded. In addition, information regarding the medical institutions that  
33  
34          served patients was obtained. Individual information was protected using encoded  
35  
36          personal identification to prevent ethical violations related to the data. Our study  
37  
38          conformed to the Declaration of Helsinki and relevant guidelines. This Institutional  
39  
40  
41  
42  
43  
44  
45  
46  
47  
48  
49  
50  
51  
52  
53  
54  
55  
56  
57  
58  
59  
60

1  
2  
3  
4 1 Review Board of the Tri-Service General Hospital, National Defense Medical Center,  
5  
6  
7 2 Taipei, Taiwan, permitted this study (TSGH IRB No.2-105-05-082).

### 3 **Patient and public involvement**

4 This is a database study using NHIRD. No patients or public were involved in setting  
5  
6  
7  
8  
9  
10  
11  
12  
13  
14  
15  
16  
17  
18  
19  
20  
21  
22  
23  
24  
25  
26  
27  
28  
29  
30  
31  
32  
33  
34  
35  
36  
37  
38  
39  
40  
41  
42  
43  
44  
45  
46  
47  
48  
49  
50  
51  
52  
53  
54  
55  
56  
57  
58  
59  
60

4 This is a database study using NHIRD. No patients or public were involved in setting  
5 out the research question or developing the outcome measures. No patients or public  
6 involved in developing plans for design or implementation of the study. No patients or  
7 public were asked to advise on interpretation or writing up of results. No patients or  
8 public were the burden of the interventions on patients assessed. The results of the  
9 research were not disseminated to those study patients.

### 10 **Sampled patients**

11 We utilized study and comparison cohorts. Using the LHID 2005, we selected  
12  
13  
14  
15  
16  
17  
18  
19  
20  
21  
22  
23  
24  
25  
26  
27  
28  
29  
30  
31  
32  
33  
34  
35  
36  
37  
38  
39  
40  
41  
42  
43  
44  
45  
46  
47  
48  
49  
50  
51  
52  
53  
54  
55  
56  
57  
58  
59  
60

11 We utilized study and comparison cohorts. Using the LHID 2005, we selected  
12 adult patients aged > 20 years who were newly diagnosed with SS (recorded from  
13 both the LHID 2005 and the Registry of Catastrophic Illness Patient Database) after  
14 2000 and who were followed-up between 2000 and 2010. We excluded patients who  
15 were diagnosed with SS before 2000 and AA or AD, Turner syndrome, aortic  
16 coarctation, bicuspid aortic valve, Marfan syndrome, or Ehler-Danlos syndrome.  
17 Patients had a tracking time < 6 months. The date of SS diagnosis was used as the  
18 index date. Control candidate sampling comparisons were selected from individuals in  
19 the LHID 2005 who lacked a history of SS. The patient and control cohorts were

1  
2  
3  
4 1 selected by 1:4 matching according to the following baseline variables: age; sex;  
5  
6 2 co-morbidities, including hypertension, diabetes mellitus (DM), hyperlipidaemia,  
7  
8  
9 3 Behcet's disease, giant cell arteritis, RA and other inflammatory polyarthropathies,  
10  
11  
12 4 relapsing polychondritis, Takayasu's arteritis, and chronic obstructive pulmonary  
13  
14  
15 5 disease (COPD); and medication history, including  $\beta$ -blockers, calcium channel  
16  
17  
18 6 blockers, angiotensin-converting enzyme inhibitors, angiotensin receptor blockers,  
19  
20  
21 7 diuretics, and steroid history. We used COPD as a proxy variable for tobacco use to  
22  
23  
24 8 eliminate its potential confounding effect as previously described.[18] The SS patient  
25  
26  
27 9 and control cohorts were matched 1:4 based on their propensity score matching, for  
28  
29  
30 10 which the matching tolerance was 0.15 with the nearest neighbour method. The  
31  
32  
33 11 independent variables were demographics, co-morbidities, medications, and SS. The  
34  
35  
36 12 propensity matching analysis was performed in the logistic regression model. We also  
37  
38  
39 13 divided SS patients into PSS and secondary SS (SSS) patients and performed a  
40  
41  
42 14 subgroup analysis. SS previously diagnosed as SLE, RA, systemic sclerosis, or  
43  
44  
45 15 primary biliary cirrhosis were defined as SSS. We integrated the ICD-9-CM codes of  
46  
47  
48 16 the above diseases into a table in the supplementary materials (Supplement Table 1).  
49  
50  
51 17 The index dates for control patients were the same as the corresponding dates for  
52  
53  
54 18 patients with AA/AD. The study outcome was a diagnosis of AA/AD during the  
55  
56  
57 19 10-year follow-up period. AA/AD was identified using ICD-9 codes. The end point of

1 the follow-up period was 2010-12-31 or the time at which AA/AD events occurred or  
2 the patient died or was lost to follow-up. We integrated the median follow-up time and  
3 follow-up year with AA/AD events in the supplementary materials (Supplement  
4 Tables 2 and 3).

## 5 **Statistical analysis**

6       Categorical variables, which are presented as percentages, were compared using  
7 the chi-square or Fisher's exact tests. Continuous variables, which are presented as the  
8 means and standard deviations, were compared using a t-test. The primary goal of the  
9 study was to determine whether SS patients exhibit an increased risk for developing  
10 AA/AD. The associations between those outcomes (prognoses) and clinical  
11 characteristics were investigated using Cox regression. The results are presented as  
12 adjusted hazard ratios (HRs) with corresponding 95% confidence intervals (CIs).  
13 Kaplan-Meier curves with the log-rank test were used to compare patients with and  
14 without SS in terms of the cumulative risk of AA or AD. The threshold for statistical  
15 significance was  $P < 0.05$ . All data analyses were conducted using SPSS software  
16 version 22 (SPSS Inc., Chicago, IL, USA).

## 17 **RESULTS**

18       A flow diagram of our patient enrolment scheme is presented in Figure 1. A total  
19 of 10,941 patients diagnosed with SS were identified in the NHIRD, which contains a

1 total of 986,713 individuals. An additional 43,764 age-, sex-, comorbidity-, and  
2 medication-matched patients were designated controls. As shown in Table 1, no  
3 significant differences in sex, age, co-morbidities, including DM, hypertension,  
4 hyperlipidaemia, Behcet's disease, giant cell arteritis, RA, relapsing polychondritis,  
5 Takayasu's arteritis, and COPD, or medications were noted between the two groups  
6 after matching. Patients with SS exhibited a significantly increased cumulative risk of  
7 developing AA/AD in subsequent years compared with patients without SS (log- rank  
8 test < 0.001, Figure 2). Table 2 presents the incidences of AA or AD during the  
9 ten-year follow-up period. At the end of the follow-up period, SS patients exhibited  
10 significantly increased incidences of AA or AD (0.43% vs. 0.37%,  $P = 0.045$ ) but  
11 lower incidences of DM (7.73% vs. 15.44%,  $P < 0.001$ ) and COPD (5.96% vs. 6.72%,  
12  $P = 0.004$ ). In addition, patients with SS were younger and exhibited higher Charlson  
13 comorbidity index (CCI) than patients without SS. The incidence for AA or AD was  
14 higher in males and older patients regardless of whether patients had SS or not  
15 (Supplement Figures 1 and 2). Regarding the use of Cox regression independent of  
16 the effects of sex, age, co-morbidities, and medication, compared with patients  
17 without SS, patients with SS also exhibited a significantly increased risk of  
18 developing AA or AD (adjusted HR = 3.642, 95% CI = 2.527-5.250,  $P < 0.001$ , Table  
19 3). The subgroup analysis revealed that patients with PSS or SSS both exhibited

1 significantly increased risks for developing AA/AD compared with patients without  
 2 SS (adjusted HR = 1.753, 95% CI = 1.108-9.382, P = 0.042; adjusted HR = 3.693,  
 3 95% CI = 2.520-5.411, P < 0.001, Table 4). We also integrated the first event of  
 4 AA/AD coding into the distribution analysis in the supplemental material  
 5 (Supplement Table 4). All patients were coded with AA/AD for the first time in the  
 6 Inpatient and ER sections.

7 Table 1 Characteristics of the study participants at baseline

| Sjögren's syndrome       | Total<br>N (%)  | With<br>N (%)   | Without<br>N (%) | P-value |
|--------------------------|-----------------|-----------------|------------------|---------|
| Total                    | 54,705          | 10,941 (20.00%) | 43,764 (80.00%)  |         |
| Sex                      |                 |                 |                  | 0.999   |
| Male                     | 10,187 (18.63%) | 2,011 (18.44%)  | 8,176 (18.68%)   |         |
| Female                   | 44,485 (81.37%) | 8,897 (81.56%)  | 35,588 (81.32%)  |         |
| Age (years)              | 55.78 ± 17.09   | 55.80 ± 16.65   | 55.77 ± 17.20    | 0.897   |
| DM                       | 3,553 (6.49%)   | 724 (6.62%)     | 2,829 (6.46%)    | 0.558   |
| Hypertension             | 8,091 (14.79%)  | 1,578 (14.42%)  | 6,513 (14.88%)   | 0.228   |
| Hyperlipidaemia          | 1,145 (2.09%)   | 234 (2.14%)     | 911 (2.08%)      | 0.709   |
| Behcet's disease         | 321 (0.59%)     | 62 (0.57%)      | 259 (0.59%)      | 0.834   |
| Giant cell arteritis     | 15 (0.03%)      | 3 (0.03%)       | 12 (0.03%)       | 0.999   |
| Rheumatoid arthritis     | 8,907 (16.28%)  | 1,784 (16.31%)  | 7,123 (16.28%)   | 0.942   |
| Relapsing polychondritis | 71 (0.13%)      | 14 (0.13%)      | 57 (0.13%)       | 0.953   |
| Takayasu's arteritis     | 15 (0.03%)      | 3 (0.03%)       | 12 (0.03%)       | 0.999   |
| COPD                     | 2,931 (5.36%)   | 581 (5.3%)      | 2,350 (5.37%)    | 0.831   |
| Steroid                  | 16,799 (30.71%) | 3,345 (30.57%)  | 13,454 (30.74%)  | 0.737   |
| β blocker                | 12,588 (23.01%) | 2,513 (22.97%)  | 10,075 (23.02%)  | 0.919   |
| CCB                      | 11,553 (21.12%) | 2,342 (21.41%)  | 9,211 (21.05%)   | 0.409   |
| ACEI                     | 13,586 (24.84%) | 2,711 (24.78%)  | 10,875 (24.85%)  | 0.878   |
| ARB                      | 12,718 (23.25%) | 2,620 (23.95%)  | 10,098 (23.07%)  | 0.054   |
| Diuretic                 | 12,440 (22.74%) | 2,429 (22.20%)  | 10,011 (22.87%)  | 0.136   |
| Statin                   | 13,922 (25.45%) | 2,811 (25.69%)  | 11,111 (25.39%)  | 0.516   |

P-value (categorical variable: Chi-square/Fisher's exact test; continuous variable: t-test)

DM = diabetes mellitus; COPD = chronic obstructive pulmonary disease; CCB = calcium channel blocker; ACEI =  
angiotensin-converting enzyme inhibitor; ARB = angiotensin receptor blocker

1 Table 2 Incidences of aortic aneurysm and dissection and other characteristics during  
2 the ten-year follow-up period

| Sjögren's syndrome                        | Total<br>N (%)  | With<br>N (%)   | Without<br>N (%) | P-value |
|-------------------------------------------|-----------------|-----------------|------------------|---------|
| <b>Total</b>                              | 54,705          | 10,941 (20.00%) | 43,764 (80.00%)  |         |
| <b>Aortic aneurysm<br/>and dissection</b> | 207 (0.38%)     | 47 (0.43%)      | 160 (0.37%)      | 0.045   |
| <b>Sex</b>                                |                 |                 |                  | 0.999   |
| Male                                      | 10,187 (18.63%) | 2,011 (18.44%)  | 8,176 (18.68%)   |         |
| Female                                    | 44,485 (81.37%) | 8,897 (81.56%)  | 35,588 (81.32%)  |         |
| <b>Age (years)</b>                        | 61.36 ± 5.41    | 60.90 ± 4.98    | 61.47 ± 5.51     | <0.001  |
| <b>DM</b>                                 | 7,603 (13.90%)  | 846 (7.73%)     | 6,757 (15.44%)   | <0.001  |
| <b>Hypertension</b>                       | 8,821 (16.12%)  | 1,708 (15.61%)  | 7,113 (16.25%)   | 0.102   |
| <b>Hyperlipidaemia</b>                    | 1,128 (2.06%)   | 240 (2.19%)     | 888 (2.03%)      | 0.279   |
| <b>Behcet's disease</b>                   | 324 (0.59%)     | 63 (0.58%)      | 261 (0.60%)      | 0.802   |
| <b>Giant cell arteritis</b>               | 16 (0.03%)      | 3 (0.03%)       | 13 (0.03%)       | 0.901   |
| <b>Rheumatoid arthritis</b>               | 9,033 (16.51%)  | 1,774 (16.21%)  | 7,259 (16.59%)   | 0.348   |
| <b>Relapsing<br/>polychondritis</b>       | 80 (0.15%)      | 19 (0.17%)      | 61 (0.14%)       | 0.401   |
| <b>Takayasu's arteritis</b>               | 15 (0.03%)      | 3 (0.03%)       | 12 (0.03%)       | 0.999   |
| <b>COPD</b>                               | 3,593 (6.57%)   | 652 (5.96%)     | 2,941 (6.72%)    | 0.004   |
| <b>CCI_R</b>                              | 0.78 ± 1.53     | 0.83 ± 1.39     | 0.77 ± 1.56      | <0.001  |
| <b>Steroid</b>                            | 17,112 (31.28%) | 3,511 (32.09%)  | 13,601 (31.08%)  | 0.041   |
| <b>β blockers</b>                         | 13,750 (25.13%) | 2,674 (24.44%)  | 11,076 (25.31%)  | 0.061   |
| <b>CCB</b>                                | 11,833 (21.63%) | 2,397 (21.91%)  | 9,436 (21.56%)   | 0.430   |
| <b>ACEI</b>                               | 13,793 (25.21%) | 2,784 (25.45%)  | 11,009 (25.16%)  | 0.532   |
| <b>ARB</b>                                | 12,976 (23.72%) | 2,681 (24.50%)  | 10,295 (23.52%)  | 0.031   |
| <b>Diuretic</b>                           | 12,692 (23.20%) | 2,507 (22.91%)  | 10,185 (23.27%)  | 0.427   |
| <b>Statin</b>                             | 14,123 (25.82%) | 2,828 (25.85%)  | 11,295 (25.81%)  | 0.934   |

P-value (categorical variable: Chi-square/Fisher's exact test; continuous variable: t-test)

CCI\_R = Charlson comorbidity index removed DM, COPD; DM = diabetes mellitus; COPD = chronic obstructive pulmonary disease; CCB = calcium channel blocker; ACEI = angiotensin-converting enzyme inhibitor; ARB = angiotensin receptor blocker



1 Table 3 Factors associated with aortic aneurysm and dissection according to Cox  
 2 regression

| Variables            | Crude HR | 95% CI      | P-value | Adjusted HR | 95% CI      | P-value |
|----------------------|----------|-------------|---------|-------------|-------------|---------|
| Sjögren's syndrome   | 3.205    | 2.254-3.565 | < 0.001 | 3.642       | 2.527-5.250 | < 0.001 |
| Sex (male)           | 2.645    | 1.974-3.597 | < 0.001 | 2.035       | 1.534-2.700 | < 0.001 |
| Age (years)          | 1.049    | 1.032-1.057 | < 0.001 | 1.043       | 1.032-1.055 | < 0.001 |
| DM                   | 1.704    | 1.389-1.944 | 0.024   | 1.674       | 1.065-1.976 | 0.037   |
| Hypertension         | 1.165    | 1.022-1.454 | 0.038   | 1.305       | 0.973-1.751 | 0.075   |
| Hyperlipidaemia      | 1.211    | 0.594-2.436 | 0.618   | 1.343       | 0.656-2.751 | 0.420   |
| Rheumatoid arthritis | 1.645    | 0.774-3.496 | 0.196   | 0.801       | 0.362-1.769 | 0.583   |
| COPD                 | 1.838    | 1.256-2.691 | 0.002   | 1.170       | 0.790-1.735 | 0.433   |
| CCI_R                | 1.036    | 0.945-1.087 | 0.074   | 1.016       | 0.968-1.065 | 0.527   |
| Steroid              | 1.497    | 0.598-2.976 | 0.495   | 1.501       | 0.339-3.298 | 0.617   |
| $\beta$ blockers     | 1.468    | 0.453-2.772 | 0.862   | 1.398       | 0.401-2.895 | 0.803   |
| CCB                  | 1.345    | 0.343-2.901 | 0.372   | 1.402       | 0.452-2.806 | 0.280   |
| ACEI                 | 1.298    | 0.426-3.041 | 0.601   | 1.288       | 0.395-2.845 | 0.334   |
| ARB                  | 1.346    | 0.379-1.986 | 0.711   | 1.345       | 0.343-1.886 | 0.682   |
| Diuretic             | 1.198    | 0.598-2.511 | 0.652   | 1.201       | 0.490-2.907 | 0.703   |
| Statin               | 1.364    | 0.667-4.972 | 0.798   | 1.335       | 0.679-4.787 | 0.897   |

HR= hazard ratio; CI = confidence interval; Adjusted HR: adjusted variables listed in the table;

CCI\_R = Charlson comorbidity index removed DM, COPD; DM = diabetes mellitus; COPD = chronic obstructive pulmonary disease; CCB = calcium channel blocker; ACEI = angiotensin-converting enzyme inhibitor; ARB = angiotensin receptor blocker

Table 4 Factors associated with aortic aneurysm and dissection stratified by primary/secondary Sjögren's syndrome using Cox regression

|                       | Patients with Sjögren's syndrome |           |                                            | Patients without Sjögren's syndrome |            |                                            | Ratio | Adjusted HR* | 95% CI      | P-value |
|-----------------------|----------------------------------|-----------|--------------------------------------------|-------------------------------------|------------|--------------------------------------------|-------|--------------|-------------|---------|
|                       | Events                           | PY        | Incidence rate<br>(per 10 <sup>5</sup> PY) | Events                              | PY         | Incidence rate<br>(per 10 <sup>5</sup> PY) |       |              |             |         |
| Total                 | 47                               | 55,860.08 | 84.14                                      | 160                                 | 253,779.88 | 63.05                                      | 1.335 | 3.642        | 2.527-5.250 | < 0.001 |
| Without RA/SLE/SS/PBC | 30                               | 36,607.55 | 81.95                                      | 158                                 | 248,694.36 | 63.53                                      | 1.290 | 1.753        | 1.108-9.382 | 0.042   |
| With RA/SLE/SS/PBC    | 17                               | 19,252.53 | 88.30                                      | 2                                   | 5,085.52   | 39.33                                      | 2.245 | 3.693        | 2.520-5.411 | < 0.001 |

PYs = person-years; Ratio = incidence of patients with AA/AD divided by the incidence of patients without AA/AD; \*Adjusted HR = adjusted hazard ratio: adjusted for age, sex, co-morbidities, and medications, as listed in Table 3, using Cox regression; CI = confidence interval; RA = rheumatoid arthritis ; SLE = systemic lupus erythematosus ; SS = systemic sclerosis ; PBC = primary biliary cirrhosis

Primary Sjögren's syndrome: Sjögren's syndrome without systemic lupus erythematosus, rheumatoid arthritis, systemic sclerosis, or primary biliary cirrhosis; Secondary Sjögren's syndrome: Sjögren's syndrome with systemic lupus erythematosus, rheumatoid arthritis , systemic sclerosis, or primary biliary cirrhosis

## 1 DISCUSSION

2 This is a retrospective cohort study including 10,941 patients with SS and  
3 43,764 patients without SS matched by age, sex, year of index date of the SS  
4 diagnosis, co-morbidities, and medication use from a large-scale nationwide  
5 population-based database. During follow-up, SS was associated with an increased  
6 incidence of the development of AA/AD compared with the comparison cohort.

7 Our research findings should remind healthcare providers of new  
8 information that SS patients exhibit an increased risk for AA or AD. Healthcare  
9 professionals should be aware of these life-threatening aortic events and aim to make  
10 early diagnosis of AA or AD. When SS patients present with chest, back, or  
11 abdominal symptoms, the possibility of AA or AD should be considered, with a  
12 specific and rapid examination.

13 SS patients exhibit an increased prevalence of developing traditional  
14 cardiovascular risk factors, such as hypertension and dyslipidaemia, which predispose  
15 patients to endothelial dysfunction and premature atherosclerosis. However, the  
16 disease-specific mechanisms associated with premature atherosclerosis in SS are not  
17 fully understood.[19] In a recent review article, cardiovascular disease was reported to  
18 be one of the primary causes of mortality in SS patients.[20] PSS shares clinical and  
19 serological features with RA and SLE, and these two diseases are associated with

1 acceleration of atherosclerosis.[21] However, the pathophysiology between SS and  
2  
3  
4 AA or AD remains unclear, although several possible mechanisms have been  
5  
6  
7 proposed. Previous studies have demonstrated that both SS and AA/AD are induced  
8  
9  
10 by chronic inflammation.[22-25] Recent studies have provided convincing evidence  
11  
12  
13 indicating that several signalling pathways are involved in both AA and SS, including  
14  
15  
16 the MAPK, TGF- $\beta$ , and MMP signalling pathways.[12-15] Activation of the innate  
17  
18  
19 immune system and the production of interferons (IFNs) could be the first stages of  
20  
21  
22 PSS pathogenesis.[26] IFNs and IL-21 could induce B-cell-activating factor (BAFF)  
23  
24  
25 and further activate B cell activity. In human salivary gland cells, interferon- $\gamma$   
26  
27  
28 modulates and increases MMP-2 and MMP-9 expression.[27] The circulating levels  
29  
30  
31 of MMP-9 were increased in patients with definite SS compared with patients with  
32  
33  
34 possible SS.[28] Furthermore, MMP-2 and MMP-9 also display a critical role in AAA  
35  
36  
37 formation.[29] MMPs play roles in tissue destruction and the weakening of the matrix,  
38  
39  
40 as noted in liver cirrhosis, fibrotic lung disease, otosclerosis, atherosclerosis, and  
41  
42  
43 multiple sclerosis.[30] Several molecules that are activated in the salivary glands,  
44  
45  
46 including JNK, NF- $\kappa$ B, and TGF- $\beta$ , also lead to inflammation and reactive oxygen  
47  
48  
49 species (ROS) production in the aortic matrix. This process may be a possible  
50  
51  
52 mechanistic pathway by which SS aggravates AA or AD.[12,13,22,31-34]

53  
54  
55 Low-dose steroids, such as prednisone, may be used to treat SS-induced  
56  
57  
58  
59  
60

1 joint and muscle pain. Prolonged or high-dose corticosteroid treatment likely causes  
2 disintegration of connective tissue of the media possibly together with primary aortic  
3 wall involvement and/or vascular damage in patients with autoimmune disorders,  
4 which can result in aortic aneurysmal enlargement and AD.[30,35] In this study, the  
5 medical condition of steroids was matched. Therefore, the effect of steroids was  
6 mitigated. The strength of our study involves its population-based database design.  
7 We accounted for several aneurysm-related confounding factors. Although we  
8 adjusted the results extensively using Cox regression models, our study had several  
9 limitations and unmeasured confounders. The NHIRD registry is not able to provide  
10 detailed information on laboratory results, family histories and health-related lifestyle  
11 factors, such as alcohol consumption and tobacco use, which can increase the risk of  
12 AA/AD and were potential confounding factors in this study. In our study, we also  
13 considered COPD incidence as a proxy variable for tobacco use to eliminate its  
14 potential confounding effect.[18] The limitation is that not all smokers develop  
15 disease. Although our study identified the association between SS and AA/AD, the  
16 cohort study design did not enable determination of the cause-effect relationship.  
17 Further prospective follow-up studies, mechanistic studies and animal experiments  
18 should be performed.

## 19 **CONCLUSION**

1 Patients with SS exhibit an increased risk for developing AA or AD, and  
2  
3  
4  
5  
6  
7  
8  
9  
10  
11  
12  
13  
14  
15  
16  
17  
18  
19  
20  
21  
22  
23  
24  
25  
26  
27  
28  
29  
30  
31  
32  
33  
34  
35  
36  
37  
38  
39  
40  
41  
42  
43  
44  
45  
46  
47  
48  
49  
50  
51  
52  
53  
54  
55  
56  
57  
58  
59  
60

1 Patients with SS exhibit an increased risk for developing AA or AD, and  
2 healthcare professionals should be aware of this risk when treating patients with SS.  
3 Increased aortic surveillance may be required in patients with SS.

#### 4 **ACKNOWLEDGEMENTS**

5 This study was supported by grants from Tri-Service General Hospital, National  
6 Defense Medical Center, Taipei, Taiwan (TSGH-C105-058), Tri-Service General  
7 Hospital, National Defense Medical, Taipei, Taiwan (TSGH-C105-173), Taoyuan  
8 Armed Forces General Hospital, Taoyuan, Taiwan (10514), and the Ministry of  
9 Science and Technology (MOST 106-2314-B-016 -008 -MY3).

#### 10 **FUNDING**

11 This study was supported by grants from Tri-Service General Hospital, National  
12 Defense Medical Center, Taipei, Taiwan (TSGH-C105-058), Tri-Service General  
13 Hospital, National Defense Medical Center, Taipei, Taiwan (TSGH-C105-173),  
14 Taoyuan Armed Forces General Hospital, Taoyuan, Taiwan (10514), and the Ministry  
15 of Science and Technology (MOST 106-2314-B-016 -008 -MY3).

#### 16 **COMPETING INTERESTS**

17 None declared.

#### 18 **AUTHOR CONTRIBUTIONS**

19 Y-DT, J-CW, and S-HT conceived and designed the study.

1 W-CC provided the materials for the study. C-HC and S-JC analysed the data.

2 C-JY and M-TL contributed reagents, materials, and analysis tools. Y-DT, J-CW,

3 W-IL, and S-HT wrote the manuscript. All the authors approved the manuscript.

#### 4 **DATA SHARING STATEMENT**

5 No additional data sharing available.

6

For peer review only

1  
2  
3  
4 **1 REFERENCES**  
5

- 6  
7 2 1. Vitali C, Bombardieri S, Jonsson R, et al. Classification criteria for Sjögren's  
8  
9 3 syndrome: a revised version of the European criteria proposed by the  
10  
11 4 American-European Consensus Group. *Ann Rheum Dis* 2002;61:554-8.  
12  
13  
14  
15 5 2. Mavragani CP, Moutsopoulos HM. The geoepidemiology of Sjögren's  
16  
17 6 syndrome. *Autoimmun Rev* 2010;9:A305-10.  
18  
19  
20 7 doi:10.1016/j.autrev.2009.11.004.  
21  
22  
23 8 3. Howard DP, Banerjee A, Fairhead JF, et al. Population-based study of  
24  
25 9 incidence and outcome of acute aortic dissection and premorbid risk factor  
26  
27 10 control: 10-year results from the Oxford Vascular Study. *Circulation*  
28  
29 11 2013;127:2031-7. doi:10.1161/CIRCULATIONAHA.112.000483.  
30  
31  
32  
33  
34 12 4. Olsson C, Thelin S, Stahle E, et al. Thoracic aortic aneurysm and dissection:  
35  
36 13 increasing prevalence and improved outcomes reported in a nationwide  
37  
38 14 population-based study of more than 14,000 cases from 1987 to 2002.  
39  
40  
41 15 *Circulation* 2006;114:2611-8. doi:10.1161/CIRCULATIONAHA.106.630400.  
42  
43  
44  
45  
46 16 5. Yeh TY, Chen CY, Huang JW, et al. Epidemiology and medication utilization  
47  
48 17 pattern of aortic dissection in Taiwan: a population-based study. *Medicine*  
49  
50 18 (*Baltimore*) 2015;94:e1522. doi:10.1097/MD.0000000000001522.  
51  
52  
53  
54 19 6. Shovman O, Tiosano S, Comaneshter D, et al. Aortic aneurysm associated  
55  
56  
57  
58  
59  
60



- 1  
2  
3  
4 1 with rheumatoid arthritis: a population-based cross-sectional study. *Clin*  
5  
6 2 *Rheumatol* 2016;35:2657-61. doi:10.1007/s10067-016-3372-0.  
7  
8  
9 3 7. Guy A, Tiosano S, Comaneshter D, et al. Aortic aneurysm association with  
10  
11  
12 4 SLE - a case-control study. *Lupus* 2016;25:959-63.  
13  
14  
15 5 doi:10.1177/0961203316628999.  
16  
17  
18 6 8. Juarez M, Toms TE, de Pablo P, et al. Cardiovascular risk factors in women  
19  
20  
21 7 with primary Sjögren's syndrome: United Kingdom primary Sjögren's  
22  
23  
24 8 syndrome registry results. *Arthritis Care Res (Hoboken)* 2014;66:757-64.  
25  
26  
27 9 9. Garcia AB, Dardin LP, Minali PA, et al. Asymptomatic atherosclerosis in  
28  
29  
30 10 primary Sjögren syndrome: correlation between low ankle brachial index and  
31  
32 11 autoantibodies positivity. *J Clin Rheumatol* 2016;22:295-8.  
33  
34  
35 12 doi:10.1097/rhu.0000000000000413.  
36  
37  
38 13 10. Chiang CH, Liu CJ, Chen PJ, et al. Primary Sjögren's syndrome and risk of  
39  
40  
41 14 ischemic stroke: a nationwide study. *Clin Rheumatol* 2014;33:931-7.  
42  
43  
44 15 doi:10.1007/s10067-014-2573-7.  
45  
46  
47 16 11. Chiang CH, Liu CJ, Chen PJ, et al. Primary Sjögren's syndrome and the risk of  
48  
49  
50 17 acute myocardial infarction: A nationwide study. *Acta Cardiol Sin*  
51  
52 18 2013;29:124-31.  
53  
54  
55 19 12. Soejima K, Nakamura H, Tamai M, et al. Activation of MKK4 (SEK1), JNK,

- 1  
2  
3  
4 1 and c-Jun in labial salivary infiltrating T cells in patients with Sjögren's  
5  
6 2 syndrome. *Rheumatol Int* 2007;27:329-33. doi:10.1007/s00296-006-0229-x.  
7  
8  
9 3 13. Nakamura H, Kawakami A, Yamasaki S, et al. Expression of mitogen  
10  
11 4 activated protein kinases in labial salivary glands of patients with Sjögren's  
12  
13 5 syndrome. *Ann Rheum Dis* 1999;58:382-5.  
14  
15  
16  
17 6 14. Ito S, Ozawa K, Zhao J, et al. Olmesartan inhibits cultured rat aortic smooth  
18  
19 7 muscle cell death induced by cyclic mechanical stretch through the inhibition  
20  
21 8 of the c-Jun N-terminal kinase and p38 signaling pathways. *J Pharmacol Sci*  
22  
23 2015;127:69-74. doi:10.1016/j.jpshs.2014.11.002.  
24  
25  
26  
27 9  
28  
29 10 15. Zhang Y, Naggar JC, Welzig CM, et al. Simvastatin inhibits angiotensin  
30  
31 11 II-induced abdominal aortic aneurysm formation in apolipoprotein E-knockout  
32  
33 12 mice: possible role of ERK. *Arterioscler Thromb Vasc Biol* 2009;29:1764-71.  
34  
35 13 doi:10.1161/ATVBAHA.109.192609.  
36  
37  
38  
39 40 14 16. Cheng CL, Kao YH, Lin SJ, et al. Validation of the National Health Insurance  
40  
41 15 Research Database with ischemic stroke cases in Taiwan. *Pharmacoepidemiol*  
42  
43 16 *Drug Saf* 2011;20:236-42. doi:10.1002/pds.2087.  
44  
45  
46  
47 48 17 17. Mao CT, Tsai ML, Wang CY, et al. Outcomes and characteristics of patients  
48  
49 18 undergoing percutaneous angioplasty followed by below-knee or above-knee  
50  
51 19 amputation for peripheral artery disease. *PLoS One* 2014;9:e111130.  
52  
53  
54  
55  
56  
57  
58  
59  
60

- 1  
2  
3  
4 1 doi:10.1371/journal.pone.0111130.  
5  
6 2 18. Yu TM, Chuang YW, Yu MC, et al. Risk of cancer in patients with polycystic  
7  
8  
9 3 kidney disease: a propensity-score matched analysis of a nationwide,  
10  
11  
12 4 population-based cohort study. *Lancet Oncol* 2016;17:1419-25.  
13  
14  
15 5 doi:10.1016/s1470-2045(16)30250-9.  
16  
17  
18 6 19. Valim V, Gerdtts E, Jonsson R, et al. Atherosclerosis in Sjögren's syndrome:  
19  
20  
21 7 evidence, possible mechanisms and knowledge gaps. *Clin Exp Rheumatol*  
22  
23  
24 8 2016;34:133-42.  
25  
26 9 20. Singh AG, Singh S, Matteson EL. Rate, risk factors and causes of mortality in  
27  
28  
29 10 patients with Sjögren's syndrome: a systematic review and meta-analysis of  
30  
31  
32 11 cohort studies. *Rheumatology (Oxford)* 2016;55:450-60.  
33  
34  
35 12 doi:10.1093/rheumatology/kev354.  
36  
37  
38 13 21. Sezis Demirci M, Karabulut G, Gungor O, et al. Is there an increased arterial  
39  
40  
41 14 stiffness in patients with primary Sjögren's syndrome? *Intern Med*  
42  
43  
44 15 2016;55:455-9. doi:10.2169/internalmedicine.55.3472.  
45  
46  
47 16 22. Sawada H, Hao H, Naito Y, et al. Aortic iron overload with oxidative stress  
48  
49  
50 17 and inflammation in human and murine abdominal aortic aneurysm.  
51  
52 18 *Arterioscler Thromb Vasc Biol* 2015;35:1507-14.  
53  
54  
55 19 doi:10.1161/atvbaha.115.305586.  
56  
57  
58  
59  
60

- 1  
2  
3  
4 1 23. Vadacca M, Margiotta D, Sambataro D, et al. [BAFF/APRIL pathway in  
5  
6  
7 2 Sjögren syndrome and systemic lupus erythematosus: relationship with  
8  
9  
10 3 chronic inflammation and disease activity]. *Reumatismo* 2010;62:259-65.  
11  
12 4 24. Cifani N, Proietta M, Tritapepe L, et al. Stanford-A acute aortic dissection,  
13  
14  
15 5 inflammation, and metalloproteinases: a review. *Ann Med* 2015;47:441-6.  
16  
17  
18 6 doi:10.3109/07853890.2015.1073346.  
19  
20  
21 7 25. Eagleton MJ. Inflammation in abdominal aortic aneurysms: cellular infiltrate  
22  
23  
24 8 and cytokine profiles. *Vascular* 2012;20:278-83.  
25  
26  
27 9 doi:10.1258/vasc.2011.201207.  
28  
29  
30 10 26. Nocturne G, Mariette X. Advances in understanding the pathogenesis of  
31  
32  
33 11 primary Sjögren's syndrome. *Nat Rev Rheumatol* 2013;9:544-56.  
34  
35  
36 12 doi:10.1038/nrrheum.2013.110.  
37  
38  
39 13 27. Wu AJ, Lafrenie RM, Park C, et al. Modulation of MMP-2 (gelatinase A) and  
40  
41  
42 14 MMP-9 (gelatinase B) by interferon-gamma in a human salivary gland cell  
43  
44  
45 15 line. *J Cell Physiol* 1997;171:117-24.  
46  
47  
48 16 doi:10.1002/(sici)1097-4652(199705)171:2<117::aid-jcp1>3.0.co;2-r.  
49  
50  
51 17 28. Hulkkonen J, Pertovaara M, Antonen J, et al. Matrix metalloproteinase 9  
52  
53  
54 18 (MMP-9) gene polymorphism and MMP-9 plasma levels in primary Sjögren's  
55  
56  
57 19 syndrome. *Rheumatology (Oxford)* 2004;43:1476-9.

- 1  
2  
3  
4 1 doi:10.1093/rheumatology/keh369.  
5  
6 2 29. Dale MA, Suh MK, Zhao S, et al. Background differences in baseline and  
7  
8  
9 3 stimulated MMP levels influence abdominal aortic aneurysm susceptibility.  
10  
11  
12 4 *Atherosclerosis* 2015;243:621-9. doi:10.1016/j.atherosclerosis.2015.10.006.  
13  
14  
15 5 30. Amalinei C, Caruntu ID, Giusca SE, et al. Matrix metalloproteinases  
16  
17 6 involvement in pathologic conditions. *Rom J Morphol Embryol*  
18  
19  
20 7 2010;51:215-28.  
21  
22  
23 8 31. Zoukhri D, Macari E, Choi SH, et al. c-Jun NH2-terminal kinase mediates  
24  
25  
26 9 interleukin-1beta-induced inhibition of lacrimal gland secretion. *J Neurochem*  
27  
28  
29 10 2006;96:126-35. doi:10.1111/j.1471-4159.2005.03529.x.  
30  
31  
32 11 32. Tsai SH, Huang PH, Peng YJ, et al. Zoledronate attenuates angiotensin  
33  
34  
35 12 II-induced abdominal aortic aneurysm through inactivation of  
36  
37  
38 13 Rho/ROCK-dependent JNK and NF-kappaB pathway. *Cardiovasc Res*  
39  
40  
41 14 2013;100:501-10. doi:10.1093/cvr/cvt230.  
42  
43  
44 15 33. Hall BE, Zheng C, Swaim WD, et al. Conditional overexpression of  
45  
46  
47 16 TGF-beta1 disrupts mouse salivary gland development and function. *Lab*  
48  
49  
50 17 *Invest* 2010;90:543-55. doi:10.1038/labinvest.2010.5.  
51  
52  
53 18 34. Jones JA, Spinale FG, Ikonomidis JS. Transforming growth factor-beta  
54  
55  
56 19 signaling in thoracic aortic aneurysm development: a paradox in pathogenesis.

- 1  
2  
3  
4 1        *J Vasc Res* 2009;46:119-37. doi:10.1159/000151766.  
5  
6  
7 2    35.    Sholter DE, Armstrong PW. Adverse effects of corticosteroids on the  
8  
9  
10 3        cardiovascular system. *Can J Cardiol* 2000;16:505-11.  
11  
12 4  
13  
14  
15  
16  
17  
18  
19  
20  
21  
22  
23  
24  
25  
26  
27  
28  
29  
30  
31  
32  
33  
34  
35  
36  
37  
38  
39  
40  
41  
42  
43  
44  
45  
46  
47  
48  
49  
50  
51  
52  
53  
54  
55  
56  
57  
58  
59  
60

For peer review only

1  
2  
3  
4 **1 FIGURE LEGENDS**

5  
6  
7 2 Figure 1. Patient selection flowchart

8  
9 3 Figure 2. Kaplan-Meier curve of the cumulative risk of aortic aneurysm or dissection  
10  
11  
12 4 due to Sjögren's syndrome

13  
14  
15  
16  
17  
18 **6 TABLE LEGENDS**

19  
20  
21 7 Table 1. Characteristics of the study participants at baseline

22  
23 8 Table 2. Incidences of aortic aneurysm and dissection and other characteristics during  
24  
25  
26 9 the ten-year follow-up period

27  
28  
29 10 Table 3. Factors associated with aortic aneurysm and dissection according to Cox  
30  
31  
32 11 regression

33  
34  
35 12 Table 4. Factors associated with aortic aneurysm or dissection stratified by  
36  
37  
38 13 primary/secondary SS using Cox regression

39  
40  
41 14

42  
43 **15 SUPPLEMENTARY MATERIAL**

44  
45  
46 16 Supplement Table 1 ICD-9-CM coding of diseases in the manuscript

47  
48  
49 17 Supplement Table 2 Years of follow-up

50  
51  
52 18 Supplement Table 3 Years to AA /AD

53  
54  
55 19 Supplement Table 4 First event of the (AA/AD) coding distribution

- 1
- 2
- 3
- 4 1 Supplement Figure 1. Sex-specific incidence of AA or AD in the study cohort, control
- 5
- 6 2 cohort, and general population.
- 7
- 8
- 9 3 Supplement Figure 2. Age-specific incidence of AA or AD in the study cohort, control
- 10
- 11
- 12 4 cohort, and general population.
- 13
- 14
- 15
- 16
- 17
- 18
- 19
- 20
- 21
- 22
- 23
- 24
- 25
- 26
- 27
- 28
- 29
- 30
- 31
- 32
- 33
- 34
- 35
- 36
- 37
- 38
- 39
- 40
- 41
- 42
- 43
- 44
- 45
- 46
- 47
- 48
- 49
- 50
- 51
- 52
- 53
- 54
- 55
- 56
- 57
- 58
- 59
- 60

For peer review only



1  
2  
3  
4  
5  
6  
7  
8  
9  
10  
11  
12  
13  
14  
15  
16  
17  
18  
19  
20  
21  
22  
23  
24  
25  
26  
27  
28  
29  
30  
31  
32  
33  
34  
35  
36  
37  
38  
39  
40  
41  
42  
43  
44  
45  
46  
47  
48  
49  
50  
51  
52  
53  
54  
55  
56  
57  
58  
59  
60

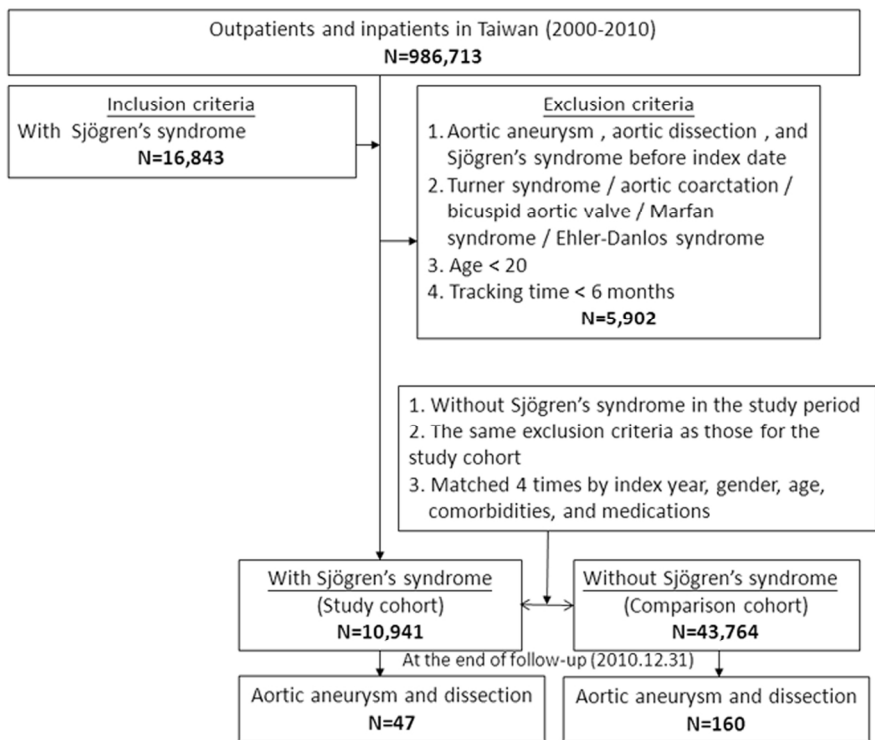

127x95mm (300 x 300 DPI)

View Only

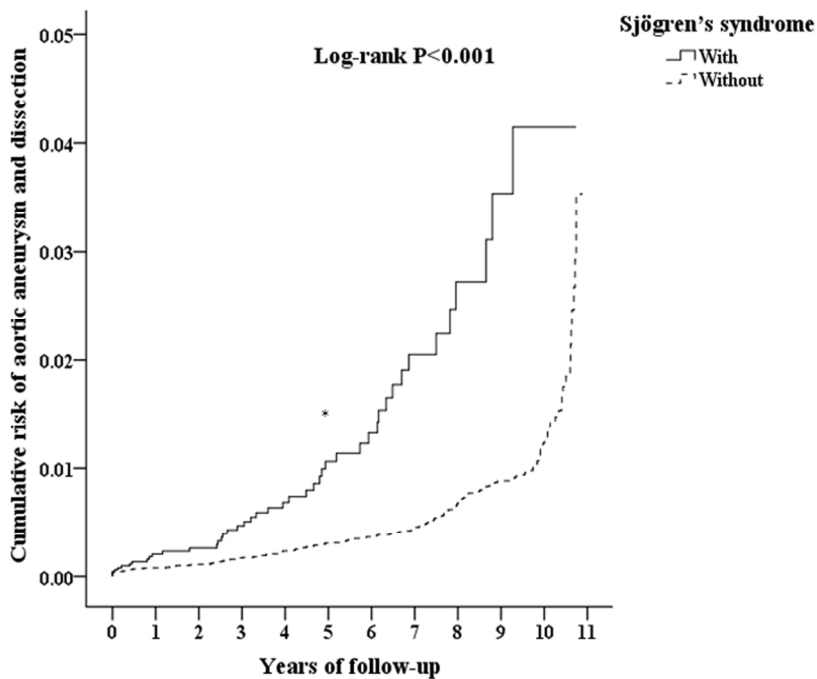

|                                       |       |       |       |       |       |       |       |        |        |        |        |
|---------------------------------------|-------|-------|-------|-------|-------|-------|-------|--------|--------|--------|--------|
| With Sjögren's syndrome (N=10,941)    | 13    | 15    | 21    | 26    | 32    | 35    | 41    | 44     | 46     | 47     | 47     |
| Without Sjögren's syndrome (N=43,764) | 27    | 36    | 49    | 63    | 77    | 81    | 94    | 113    | 130    | 146    | 160    |
| <b>P value</b>                        | 0.897 | 0.513 | 0.275 | 0.102 | 0.036 | 0.015 | 0.001 | <0.001 | <0.001 | <0.001 | <0.001 |

\*:  $P < 0.05$  is considered statistically significant

145x124mm (300 x 300 DPI)

Only

1  
2  
3  
4  
5  
6  
7  
8  
9  
10  
11  
12  
13  
14  
15  
16  
17  
18  
19  
20  
21  
22  
23  
24  
25  
26  
27  
28  
29  
30  
31  
32  
33  
34  
35  
36  
37  
38  
39  
40  
41  
42  
43  
44  
45  
46  
47  
48  
49  
50  
51  
52  
53  
54  
55  
56  
57  
58  
59  
60

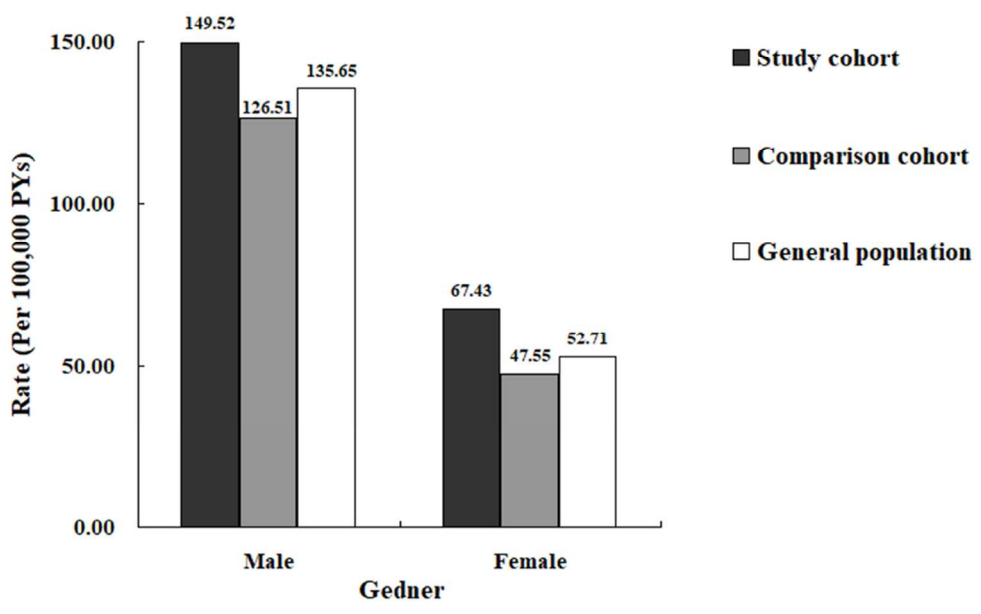

90x57mm (300 x 300 DPI)

view only

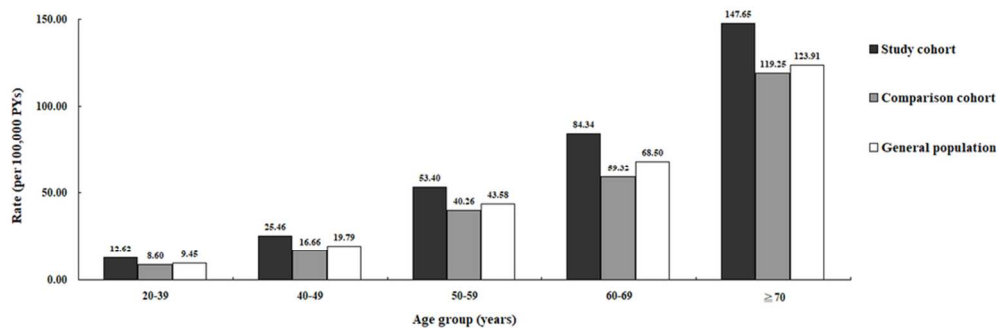

90x29mm (300 x 300 DPI)

peer review only

Supplement Table 1 ICD-9-CM coding of diseases in the manuscript

| Disease                        | ICD-9-CM    | Disease                   | ICD-9-CM |
|--------------------------------|-------------|---------------------------|----------|
| Aortic aneurysm and dissection | 441.0-441.9 | Behcet's disease          | 136.1    |
| Sjögren's syndrome             | 710.2       | Giant cell arteritis      | 446.5    |
| Turner syndrome                | 758.6       | RA                        | 714      |
| Aortic coarctation             | 747.10      | Relapsing polychondritis  | 733.99   |
| Bicuspid aortic valve          | 746.4       | Takayasu's arteritis      | 446.7    |
| Marfan syndrome                | 759.82      | COPD                      | 490-496  |
| Ehler-Danlos syndrome          | 756.83      | SLE                       | 710.0    |
| Diabetes mellitus              | 250         | Systemic sclerosis        | 701.1    |
| Hypertension                   | 401-405     | Primary biliary cirrhosis | 571.6    |
| Hyperlipidaemia                | 272.0-272.4 |                           |          |

RA = rheumatoid arthritis and other inflammatory polyarthropathies; COPD = chronic obstructive pulmonary disease; SLE = systemic lupus erythematosus

Supplement Table 2 Years of follow-up

| <b>Sjögren's syndrome</b> | <b>Min</b> | <b>Middle</b> | <b>Max</b> | <b>Mean ± SD</b> |
|---------------------------|------------|---------------|------------|------------------|
| <b>With</b>               | 0.50       | 3.26          | 10.91      | 5.11 ± 7.52      |
| <b>Without</b>            | 0.50       | 4.57          | 10.98      | 5.80 ± 5.53      |
| <b>Total</b>              | 0.50       | 3.69          | 10.98      | 5.66 ± 5.99      |

For peer review only

1  
2  
3  
4  
5  
6  
7  
8  
9  
10  
11  
12  
13  
14  
15  
16  
17  
18  
19  
20  
21  
22  
23  
24  
25  
26  
27  
28  
29  
30  
31  
32  
33  
34  
35  
36  
37  
38  
39  
40  
41  
42  
43  
44  
45  
46  
47  
48  
49  
50  
51  
52  
53  
54  
55  
56  
57  
58  
59  
60

Supplement Table 3 Years to AA/AD

| <b>Sjögren's syndrome</b> | <b>Min</b> | <b>Middle</b> | <b>Max</b> | <b>Mean ± SD</b> |
|---------------------------|------------|---------------|------------|------------------|
| <b>With</b>               | 0.51       | 3.32          | 9.27       | 4.67 ± 3.82      |
| <b>Without</b>            | 0.52       | 5.07          | 10.87      | 5.53 ± 3.65      |
| <b>Total</b>              | 0.51       | 4.93          | 10.87      | 5.12 ± 3.49      |

For peer review only

Supplement Table 4 First event of the (AA/AD) coding distribution

| Sjögren's syndrome | Inpatient |       | Emergency Room |       |
|--------------------|-----------|-------|----------------|-------|
|                    | N         | %     | N              | %     |
| With               | 40        | 85.11 | 7              | 14.89 |
| Without            | 141       | 88.12 | 19             | 11.88 |
| Total              | 181       | 87.44 | 26             | 12.56 |

For peer review only



**STROBE 2007 (v4) Statement—Checklist of items that should be included in reports of cohort studies**

| Section/Topic             | Item # | Recommendation                                                                                                                                                                       | Reported on page # |
|---------------------------|--------|--------------------------------------------------------------------------------------------------------------------------------------------------------------------------------------|--------------------|
| Title and abstract        | 1      | (a) Indicate the study’s design with a commonly used term in the title or the abstract                                                                                               | 3                  |
|                           |        | (b) Provide in the abstract an informative and balanced summary of what was done and what was found                                                                                  | 3-4                |
| <b>Introduction</b>       |        |                                                                                                                                                                                      |                    |
| Background/rationale      | 2      | Explain the scientific background and rationale for the investigation being reported                                                                                                 | 6                  |
| Objectives                | 3      | State specific objectives, including any prespecified hypotheses                                                                                                                     | 7                  |
| <b>Methods</b>            |        |                                                                                                                                                                                      |                    |
| Study design              | 4      | Present key elements of study design early in the paper                                                                                                                              | 11                 |
| Setting                   | 5      | Describe the setting, locations, and relevant dates, including periods of recruitment, exposure, follow-up, and data collection                                                      | 10-11              |
| Participants              | 6      | (a) Give the eligibility criteria, and the sources and methods of selection of participants. Describe methods of follow-up                                                           | 8                  |
|                           |        | (b) For matched studies, give matching criteria and number of exposed and unexposed                                                                                                  | 10                 |
| Variables                 | 7      | Clearly define all outcomes, exposures, predictors, potential confounders, and effect modifiers. Give diagnostic criteria, if applicable                                             | 9-10               |
| Data sources/ measurement | 8*     | For each variable of interest, give sources of data and details of methods of assessment (measurement). Describe comparability of assessment methods if there is more than one group | 10                 |
| Bias                      | 9      | Describe any efforts to address potential sources of bias                                                                                                                            | 19                 |
| Study size                | 10     | Explain how the study size was arrived at                                                                                                                                            | 17                 |
| Quantitative variables    | 11     | Explain how quantitative variables were handled in the analyses. If applicable, describe which groupings were chosen and why                                                         | 9-10               |
| Statistical methods       | 12     | (a) Describe all statistical methods, including those used to control for confounding                                                                                                | 10                 |
|                           |        | (b) Describe any methods used to examine subgroups and interactions                                                                                                                  | 11                 |
|                           |        | (c) Explain how missing data were addressed                                                                                                                                          | 11                 |
|                           |        | (d) If applicable, explain how loss to follow-up was addressed                                                                                                                       | 11                 |
|                           |        | (e) Describe any sensitivity analyses                                                                                                                                                | 11                 |
| <b>Results</b>            |        |                                                                                                                                                                                      |                    |

|                          |     |                                                                                                                                                                                                              |     |
|--------------------------|-----|--------------------------------------------------------------------------------------------------------------------------------------------------------------------------------------------------------------|-----|
| Participants             | 13* | (a) Report numbers of individuals at each stage of study—eg numbers potentially eligible, examined for eligibility, confirmed eligible, included in the study, completing follow-up, and analysed            | 11  |
|                          |     | (b) Give reasons for non-participation at each stage                                                                                                                                                         | 8-9 |
|                          |     | (c) Consider use of a flow diagram                                                                                                                                                                           | 11  |
| Descriptive data         | 14* | (a) Give characteristics of study participants (eg demographic, clinical, social) and information on exposures and potential confounders                                                                     | 11  |
|                          |     | (b) Indicate number of participants with missing data for each variable of interest                                                                                                                          | 11  |
|                          |     | (c) Summarise follow-up time (eg, average and total amount)                                                                                                                                                  | 11  |
| Outcome data             | 15* | Report numbers of outcome events or summary measures over time                                                                                                                                               | 12  |
| Main results             | 16  | (a) Give unadjusted estimates and, if applicable, confounder-adjusted estimates and their precision (eg, 95% confidence interval). Make clear which confounders were adjusted for and why they were included | 12  |
|                          |     | (b) Report category boundaries when continuous variables were categorized                                                                                                                                    | 11  |
|                          |     | (c) If relevant, consider translating estimates of relative risk into absolute risk for a meaningful time period                                                                                             | 12  |
| Other analyses           | 17  | Report other analyses done—eg analyses of subgroups and interactions, and sensitivity analyses                                                                                                               | 12  |
| <b>Discussion</b>        |     |                                                                                                                                                                                                              |     |
| Key results              | 18  | Summarise key results with reference to study objectives                                                                                                                                                     | 17  |
| <b>Limitations</b>       |     |                                                                                                                                                                                                              |     |
| Interpretation           | 20  | Give a cautious overall interpretation of results considering objectives, limitations, multiplicity of analyses, results from similar studies, and other relevant evidence                                   | 19  |
| Generalisability         | 21  | Discuss the generalisability (external validity) of the study results                                                                                                                                        | 19  |
| <b>Other information</b> |     |                                                                                                                                                                                                              |     |
| Funding                  | 22  | Give the source of funding and the role of the funders for the present study and, if applicable, for the original study on which the present article is based                                                | 20  |

\*Give information separately for cases and controls in case-control studies and, if applicable, for exposed and unexposed groups in cohort and cross-sectional studies.

**Note:** An Explanation and Elaboration article discusses each checklist item and gives methodological background and published examples of transparent reporting. The STROBE checklist is best used in conjunction with this article (freely available on the Web sites of PLoS Medicine at <http://www.plosmedicine.org/>, Annals of Internal Medicine at <http://www.annals.org/>, and Epidemiology at <http://www.epidem.com/>). Information on the STROBE Initiative is available at [www.strobe-statement.org](http://www.strobe-statement.org).

# BMJ Open

## Risk of aortic aneurysm and dissection in patients with Sjögren's syndrome: a nationwide population-based cohort study in Taiwan

|                                 |                                                                                                                                                                                                                                                                                                                                                                                                                                                                                                                                                                                                                                                                                                                                                                                                                                                                                                                                                                                                                                                                                                                                                                                                                                                                                                                                                                                 |
|---------------------------------|---------------------------------------------------------------------------------------------------------------------------------------------------------------------------------------------------------------------------------------------------------------------------------------------------------------------------------------------------------------------------------------------------------------------------------------------------------------------------------------------------------------------------------------------------------------------------------------------------------------------------------------------------------------------------------------------------------------------------------------------------------------------------------------------------------------------------------------------------------------------------------------------------------------------------------------------------------------------------------------------------------------------------------------------------------------------------------------------------------------------------------------------------------------------------------------------------------------------------------------------------------------------------------------------------------------------------------------------------------------------------------|
| Journal:                        | <i>BMJ Open</i>                                                                                                                                                                                                                                                                                                                                                                                                                                                                                                                                                                                                                                                                                                                                                                                                                                                                                                                                                                                                                                                                                                                                                                                                                                                                                                                                                                 |
| Manuscript ID                   | bmjopen-2018-022326.R2                                                                                                                                                                                                                                                                                                                                                                                                                                                                                                                                                                                                                                                                                                                                                                                                                                                                                                                                                                                                                                                                                                                                                                                                                                                                                                                                                          |
| Article Type:                   | Research                                                                                                                                                                                                                                                                                                                                                                                                                                                                                                                                                                                                                                                                                                                                                                                                                                                                                                                                                                                                                                                                                                                                                                                                                                                                                                                                                                        |
| Date Submitted by the Author:   | 18-Aug-2018                                                                                                                                                                                                                                                                                                                                                                                                                                                                                                                                                                                                                                                                                                                                                                                                                                                                                                                                                                                                                                                                                                                                                                                                                                                                                                                                                                     |
| Complete List of Authors:       | <p>Tsai, Yi-Da; Tri-Service General Hospital, National Defense Medical Center, Department of Emergency medicine</p> <p>Chien, Wu-Chien ; Tri-Service General Hospital, National Defense Medical Center, Department of Medical Research; National Defense Medical Center, School of Public Health</p> <p>Tsai, Shih-Hung ; Tri-Service General Hospital, National Defense Medical Center, Department of Emergency Medicine</p> <p>Chung, Chi-Hsiang; Tri-Service General Hospital, National Defense Medical Center, Department of Medical Research; National Defense Medical Center, School of Public Health</p> <p>Chu, Shi-Jye ; Tri-Service General Hospital, National Defense Medical Center, Division of Rheumatology, Immunology and Allergy, Department of Internal Medicine</p> <p>Chen, Sy-Jou ; Tri-Service General Hospital, National Defense Medical Center, Department of Emergency Medicine</p> <p>Liao, Wen-I; Tri-Service General Hospital, National Defense Medical Center, Department of Emergency Medicine</p> <p>Yang, Chih-Jen; Tri-Service General Hospital, National Defense Medical Center, Emergency Medicine</p> <p>Liao, Min-Tser ; Taoyuan Armed Forces General Hospital,, Department of Pediatrics</p> <p>Wang, Jen-Chun; Tri-Service General Hospital, National Defense Medical Center, department of Emergency Medicine, Emergency Department</p> |
| <b>Primary Subject Heading</b>: | Rheumatology                                                                                                                                                                                                                                                                                                                                                                                                                                                                                                                                                                                                                                                                                                                                                                                                                                                                                                                                                                                                                                                                                                                                                                                                                                                                                                                                                                    |
| Secondary Subject Heading:      | Cardiovascular medicine                                                                                                                                                                                                                                                                                                                                                                                                                                                                                                                                                                                                                                                                                                                                                                                                                                                                                                                                                                                                                                                                                                                                                                                                                                                                                                                                                         |
| Keywords:                       | Sjögren's syndrome, aortic dissection, aortic aneurysm                                                                                                                                                                                                                                                                                                                                                                                                                                                                                                                                                                                                                                                                                                                                                                                                                                                                                                                                                                                                                                                                                                                                                                                                                                                                                                                          |
|                                 |                                                                                                                                                                                                                                                                                                                                                                                                                                                                                                                                                                                                                                                                                                                                                                                                                                                                                                                                                                                                                                                                                                                                                                                                                                                                                                                                                                                 |

SCHOLARONE™  
Manuscripts

1  
2  
3  
4 **1 Increased risk of aortic aneurysm and dissection in patients with Sjögren's**  
5  
6 **2 syndrome: a nationwide population-based cohort study in Taiwan**  
7  
8  
9  
10 **3**

11  
12 4 Yi-Da Tsai MD<sup>1</sup>, Wu-Chien Chien PhD<sup>2,3</sup>, Shih-Hung Tsai MD, PhD<sup>1</sup>, Chi-Hsiang  
13  
14  
15 5 Chung PhD<sup>2,3,4</sup>, Shi-Jye Chu MD<sup>5</sup>, Sy-Jou Chen MD, MS<sup>1,6</sup>, Wen-I Liao MD<sup>1</sup>,  
16  
17  
18 6 Chih-Jen Yang MD<sup>1</sup>, Min-Tser Liao, MD<sup>7</sup>, Jen-Chun Wang MD<sup>1,8,\*</sup>  
19  
20  
21  
22

23 8 <sup>1</sup>Department of Emergency Medicine, Tri-Service General Hospital, National Defense  
24  
25  
26 9 Medical Center, Taipei, Taiwan  
27  
28

29 10 <sup>2</sup>Department of Medical Research, Tri-Service General Hospital, National Defense  
30  
31  
32 11 Medical Center  
33  
34

35 12 <sup>3</sup>School of Public Health, National Defense Medical Center, Taipei, Taiwan  
36  
37

38 13 <sup>4</sup>Taiwanese Injury Prevention and Safety Promotion Association, Taipei, Taiwan  
39  
40

41 14 <sup>5</sup>Division of Rheumatology, Immunology and Allergy, Department of Internal Medicine,  
42  
43 15 Tri-Service General Hospital, National Defense Medical Center, Taipei, Taiwan  
44  
45

46 16 <sup>6</sup>Graduate Institute of Injury Prevention and Control, College of Public Health and  
47  
48 17 Nutrition, Taipei Medical University, Taipei, Taiwan  
49  
50

51 18 <sup>7</sup>Department of Pediatrics, Taoyuan Armed Forces General Hospital, Taoyuan, Taiwan  
52  
53

54 19 <sup>8</sup>Institute of Clinical Medicine, National Yang-Ming University, Taipei, Taiwan  
55  
56  
57  
58  
59  
60

1 \*Corresponding author:

2 **Dr. Jen-Chun Wang**

3 Department of Emergency Medicine,

4 Tri-Service General Hospital, National Defense Medical Center, Taipei, Taiwan

5 No. 325, Sec. 2, Cheng-Kung Road, Neihu Dist., Taipei City 11490, Taiwan

6 E-mail: royalflushwang@gmail.com

7 Tel.: + 886-2-87923311-16877;

8 Fax: + 886-2-87927034

9

10 Word count:

11 2752

1  
2  
3  
4 **1 ABSTRACT**

5  
6 **2 Objectives:** Sjögren's syndrome (SS) is a systemic autoimmune disorder. Several  
7  
8  
9  
10  
11  
12  
13  
14  
15  
16  
17  
18  
19  
20  
21  
22  
23  
24  
25  
26  
27  
28  
29  
30  
31  
32  
33  
34  
35  
36  
37  
38  
39  
40  
41  
42  
43  
44  
45  
46  
47  
48  
49  
50  
51  
52  
53  
54  
55  
56  
57  
58  
59  
60  
3  
molecular pathways and the activation of matrix metalloproteinases associated with  
the pathogenesis of SS participate in the initiation and progression of aortic aneurysm  
(AA) and aortic dissection (AD). In this study, we aimed to evaluate whether patients  
with SS exhibit an increased risk of AA or AD.

**7 Methods:** We conducted a retrospective cohort study using a database extracted from  
8  
9  
10  
11  
12  
13  
14  
15  
16  
17  
18  
19  
20  
21  
22  
23  
24  
25  
26  
27  
28  
29  
30  
31  
32  
33  
34  
35  
36  
37  
38  
39  
40  
41  
42  
43  
44  
45  
46  
47  
48  
49  
50  
51  
52  
53  
54  
55  
56  
57  
58  
59  
60  
Taiwan's National Health Insurance Research Database (NHIRD). All medical  
conditions for each case and control were categorised using the International  
Classification of Diseases, 9<sup>th</sup> Revision (ICD-9). Hazard ratios (HRs) and 95%  
confidence intervals (CIs) for associations between SS and AA/AD were estimated  
using Cox regression and adjusted for co-morbidities.

**13 Results:** Our analyses included 10,941 SS cases and 43,764 propensity score-matched  
14  
15  
16  
17  
18  
19  
20  
21  
22  
23  
24  
25  
26  
27  
28  
29  
30  
31  
32  
33  
34  
35  
36  
37  
38  
39  
40  
41  
42  
43  
44  
45  
46  
47  
48  
49  
50  
51  
52  
53  
54  
55  
56  
57  
58  
59  
60  
controls. Compared with the controls, the patients with SS exhibited a significantly  
increased risk of developing an AA or AD (adjusted HR = 3.642, P < 0.001).

Subgroup analysis revealed that compared with patients without SS, patients with  
primary and secondary SS both exhibited a significantly increased risk of developing  
AA or AD (adjusted HR = 1.753, P = 0.042; adjusted HR = 3.693, P < 0.001).

**19 Conclusion:** Patients with SS exhibit increased risks of developing AA or AD, and

1  
2  
3  
4 1 healthcare professionals should be aware of this risk when treating patients with SS.  
5

6  
7 2 Increased aortic surveillance may be required for patients with SS syndrome.  
8

9  
10 3

11  
12 4 **Keywords:** Sjögren's syndrome, aortic dissection, aortic aneurysm  
13

14  
15 5  
16  
17  
18  
19  
20  
21  
22  
23  
24  
25  
26  
27  
28  
29  
30  
31  
32  
33  
34  
35  
36  
37  
38  
39  
40  
41  
42  
43  
44  
45  
46  
47  
48  
49  
50  
51  
52  
53  
54  
55  
56  
57  
58  
59  
60

For peer review only

## 1    **STRENGTHS AND LIMITATIONS OF THIS STUDY**

- 2    ●    The strength of our study is its population-based cohort design with a large  
3  
4    sample size.
- 5  
6    ●    The patients and controls were selected by 1:4 matching according to the  
7  
8    following baseline variables: age; sex; co-morbidities; and medications used.  
9  
10    This population-based cohort study was adjusted for potential risk factors to  
11  
12    minimize study bias.
- 13  
14    ●    This was a retrospective cohort study.
- 15  
16    ●    NHIRD cannot provide detailed information regarding the laboratory results  
17  
18    or lifestyle factors of the patients.
- 19  
20    ●    Our results are limited to human data. Both mechanistic and animal studies are  
21  
22    required for further clarification.  
23  
24  
25  
26  
27  
28  
29  
30  
31  
32  
33  
34  
35  
36  
37  
38  
39  
40  
41  
42  
43  
44  
45  
46  
47  
48  
49  
50  
51  
52  
53  
54  
55  
56  
57  
58  
59  
60



## 1 INTRODUCTION

2 Sjögren's syndrome (SS) is a systemic autoimmune disorder commonly  
3 presenting with dry eyes and mouth. The prevalence of SS is between 0.1% and 4.8%  
4 in various populations when strictly defined according to the American-European  
5 Consensus Criteria, and it is one of the most common autoimmune diseases.[1] SS  
6 may affect patients at any age, but more cases occur in the fourth decade of life, and  
7 there is a female predominance. The female-male ratio is approximately 9:1.[2] Aortic  
8 aneurysms (AAs) are often diagnosed inadvertently and are a common cause of  
9 sudden death. Enlarged aneurysms can result in rupture. Aortic dissection (AD) is one  
10 of the deadliest complications of thoracic aortic disease. Estimates of the incidence of  
11 AD range from 6 cases per 100,000 to 16.3 per 100,000 in England and Sweden,  
12 respectively.[3,4] Regarding the Asian population, the average annual incidence of  
13 AD is 5.6 per 100,000 persons in Taiwan and the prevalence is 19.9 per 100,000  
14 persons, with a predominance noted among men 50 to 54 years of age (27.3 per  
15 100,000 persons per year).[5]

16 Previous studies have demonstrated that AA is more prevalent in patients with  
17 rheumatoid arthritis (RA) and systemic lupus erythematosus (SLE) compared with the  
18 general population.[6,7] Compared with age- and sex-matched healthy controls,  
19 primary SS (PSS) patients exhibited a 2-fold increased prevalence of hypertension

1 and hypertriglyceridemia. Furthermore, hypertension is underdiagnosed and  
2 suboptimally treated in PSS.[8] SS with positive autoantibodies is associated with a  
3 low ankle-brachial index, which may indicate an increased risk of early  
4 atherosclerosis.[9] Nonetheless, previous population-based studies indicated that SS is  
5 not associated with an increased risk of subsequent acute myocardial infarction (AMI)  
6 and ischaemic stroke.[10,11]

7       Several molecular mechanisms, including JNK, NF- $\kappa$ B and TGF- $\beta$  signalling  
8 pathways, and matrix metalloproteinase (MMP) activation are associated with the  
9 pathogenesis of SS.[12,13] These molecular mechanisms also actively participate in  
10 the initiation and progression of AA or AD.[14,15] Based on these findings, we  
11 hypothesized that patients with SS may have an increased risk of AA or AD due to  
12 SS-related cardiovascular risks and shared molecular mechanisms. However, the  
13 association between SS and AA or AD has not been thoroughly evaluated in  
14 large-scale studies. Therefore, we aimed to determine whether SS patients exhibited  
15 an increased risk of AA or AD using a nationwide healthcare insurance claim  
16 database.

## 17 **METHODS**

### 18 **Data source**

1           The data described herein were acquired from the Longitudinal Health Insurance  
2  
3  
4           Database 2005 (LHID 2005), a subgroup database of the Taiwan National Health  
5  
6           Insurance Research Database (NHIRD) used for the nationwide population-based  
7  
8           retrospective cohort study. The National Health Insurance programme in Taiwan  
9  
10          provides health care for 99% of the population (greater than 23 million people) and  
11  
12          was implemented in 1995. The LHID 2005 provides information on medical service  
13  
14          utilization using a randomly selected sample of approximately one million people  
15  
16          receiving benefits, representing approximately 5% of Taiwan's population in 2005.  
17  
18          The information was obtained from the NHIRD between 2000 and 2010. The  
19  
20          accuracy of the diagnoses in the NHIRD, particularly the diagnoses of major diseases  
21  
22          (e.g., acute coronary syndrome and stroke), has been corroborated.[16,17] The LHID  
23  
24          is composed of "de-identified" secondary data that are available to the public via open  
25  
26          access for research. ICD-9-CM (International Classification of Diseases, 9th Revision,  
27  
28          Clinical Modification) diagnostic and procedure codes (up to five each), sex,  
29  
30          birthdays, patient identification numbers, dates of admission and discharge, and  
31  
32          outcomes are coded. In addition, information regarding the medical institutions that  
33  
34          served patients was obtained. Individual information was protected using encoded  
35  
36          personal identification to prevent ethical violations related to the data. Our study  
37  
38          conformed to the Declaration of Helsinki and relevant guidelines. This Institutional  
39  
40  
41  
42  
43  
44  
45  
46  
47  
48  
49  
50  
51  
52  
53  
54  
55  
56  
57  
58  
59  
60

1  
2  
3  
4 1 Review Board of the Tri-Service General Hospital, National Defense Medical Center,  
5  
6  
7 2 Taipei, Taiwan, permitted this study (TSGH IRB No.2-105-05-082).  
8

### 9 3 **Patient and public involvement**

10  
11  
12 4 This is a database study using NHIRD. No patients or public were involved in setting  
13  
14  
15 5 out the research question or developing the outcome measures. No patients or public  
16  
17  
18 6 involved in developing plans for design or implementation of the study. No patients or  
19  
20  
21 7 public were asked to advise on interpretation or writing up of results. No patients or  
22  
23  
24 8 public were the burden of the interventions on patients assessed. The results of the  
25  
26  
27 9 research were not disseminated to those study patients.  
28

### 29 10 **Sampled patients**

30  
31  
32 11 We utilized study and comparison cohorts. Using the LHID 2005, we selected  
33  
34  
35 12 adult patients aged > 20 years who were newly diagnosed with SS (recorded from  
36  
37  
38 13 both the LHID 2005 and the Registry of Catastrophic Illness Patient Database) after  
39  
40  
41 14 2000 and who were followed-up between 2000 and 2010. We excluded patients who  
42  
43  
44 15 were diagnosed with SS before 2000 and had AA or AD, Turner syndrome, aortic  
45  
46  
47 16 coarctation, bicuspid aortic valve, Marfan syndrome, or Ehler-Danlos syndrome.  
48  
49  
50 17 Patients who had a tracking time < 6 months were also excluded in order to decrease  
51  
52  
53 18 the probability of including AA/AD cases that went undiagnosed before SS diagnosis.  
54  
55  
56 19 The date of SS diagnosis was used as the index date. Control candidate sampling  
57  
58  
59

1 comparisons were selected from individuals in the LHID 2005 who lacked a history  
2 of SS. The patient and control cohorts were selected by 1:4 matching according to the  
3 following baseline variables: age; sex; co-morbidities, including hypertension,  
4 diabetes mellitus (DM), hyperlipidaemia, Behcet's disease, giant cell arteritis, RA and  
5 other inflammatory polyarthropathies, relapsing polychondritis, Takayasu's arteritis,  
6 and chronic obstructive pulmonary disease (COPD); and medication history, including  
7  $\beta$ -blockers, calcium channel blockers, angiotensin-converting enzyme inhibitors,  
8 angiotensin receptor blockers, diuretics, and steroid history. We used COPD as a  
9 proxy variable for tobacco use to eliminate its potential confounding effect as  
10 previously described.[18] The SS patient and control cohorts were matched 1:4 based  
11 on their propensity score matching, for which the matching tolerance was 0.15 with  
12 the nearest neighbour method. The independent variables were demographics,  
13 co-morbidities, medications, and SS. The dependent variables were AA and AD. We  
14 also divided SS patients into PSS and secondary SS (SSS) patients and performed a  
15 subgroup analysis. SS previously diagnosed as SLE, RA, systemic sclerosis, or  
16 primary biliary cirrhosis were defined as SSS. We integrated the ICD-9-CM codes of  
17 the above diseases into a table in the supplementary materials (Supplement Table 1).  
18 The index dates for control patients were the same as the corresponding dates for  
19 patients with AA/AD. The study outcome was a diagnosis of AA/AD during the

1 10-year follow-up period. AA/AD was identified using ICD-9 codes. The end point of  
2 the follow-up period was 2010-12-31 or the time at which AA/AD events occurred or  
3 the patient died or was lost to follow-up. We integrated the median follow-up time and  
4 follow-up year with AA/AD events in the supplementary materials (Supplement  
5 Tables 2 and 3).

## 6 **Statistical analysis**

7 Propensity matching analysis was performed in the logistic regression model.  
8 The potential confounders were index year, gender, age, comorbidities, and  
9 medications. The match tolerance was 0.15 with the nearest neighbour method. The  
10 study comparison cohort-matching ratio was 4-fold (study: comparison = 1:4).  
11 Categorical variables, which are presented as percentages, were compared using the  
12 chi-square or Fisher's exact tests. Continuous variables, which are presented as the  
13 means and standard deviations, were compared using a t-test. The primary goal of the  
14 study was to determine whether SS patients exhibit an increased risk for developing  
15 AA/AD. The associations between those outcomes (prognoses) and clinical  
16 characteristics were investigated using Cox regression. As shown in Supplement  
17 Tables 4, all explanatory variables in the fully adjusted model were retained. The  
18 results are presented as adjusted hazard ratios (HRs) with corresponding 95%  
19 confidence intervals (CIs). Kaplan-Meier curves with the log-rank test were used to

1 compare patients with and without SS in terms of the cumulative risk of AA or AD.

2 The threshold for statistical significance was  $P < 0.05$ . All data analyses were

3 conducted using SPSS software version 22 (SPSS Inc., Chicago, IL, USA).

#### 4 **RESULTS**

5 A flow diagram of our patient enrolment scheme is presented in Figure 1. A total  
6 of 10,941 patients diagnosed with SS were identified in the NHIRD, which contains a  
7 total of 986,713 individuals. An additional 43,764 age-, sex-, comorbidity-, and  
8 medication-matched patients were designated controls. As shown in Table 1, no  
9 significant differences in sex, age, co-morbidities, including DM, hypertension,  
10 hyperlipidaemia, Behcet's disease, giant cell arteritis, RA, relapsing polychondritis,  
11 Takayasu's arteritis, and COPD, or medications were noted between the two groups  
12 after matching. Patients with SS exhibited a significantly increased cumulative risk of  
13 developing AA/AD in subsequent years compared with patients without SS (log- rank  
14 test  $< 0.001$ , Figure 2). Table 2 presents the incidences of AA or AD during the  
15 ten-year follow-up period. At the end of the follow-up period, SS patients exhibited  
16 significantly increased incidences of AA or AD (0.43% vs. 0.37%,  $P = 0.045$ ) but  
17 lower incidences of DM (7.73% vs. 15.44%,  $P < 0.001$ ) and COPD (5.96% vs. 6.72%,  
18  $P = 0.004$ ). In addition, patients with SS were younger and exhibited higher Charlson  
19 comorbidity index (CCI) than patients without SS. The incidence for AA or AD was

1 higher in males and older patients regardless of whether patients had SS or not  
2  
3  
4  
5  
6 (Supplement Figures 1 and 2). Regarding the use of Cox regression independent of  
7  
8  
9 the effects of sex, age, co-morbidities, and medication, compared with patients  
10  
11  
12 without SS, patients with SS also exhibited a significantly increased risk of  
13  
14  
15 developing AA or AD (adjusted HR = 3.642, 95% CI = 2.527-5.250, P < 0.001, Table  
16  
17  
18 3). The subgroup analysis revealed that patients with PSS or SSS both exhibited  
19  
20  
21 significantly increased risks for developing AA/AD compared to patients without SS  
22  
23  
24 (adjusted HR = 1.753, 95% CI = 1.108-9.382, P = 0.042; adjusted HR = 3.693, 95%  
25  
26  
27 CI = 2.520-5.411, P < 0.001, Table 4). We also have included the first event of  
28  
29  
30 AA/AD coding into the distribution analysis in the supplemental material  
31  
32 (Supplement Table 5). All patients were coded with AA/AD for the first time in the  
33  
34  
35 Inpatient and ER sections.  
36  
37  
38  
39  
40  
41  
42  
43  
44  
45  
46  
47  
48  
49  
50  
51  
52  
53  
54  
55  
56  
57  
58  
59  
60



1

2

3 Table 1 Characteristics of the study participants at baseline

| Sjögren's syndrome       | Total<br>N (%)  | With<br>N (%)   | Without<br>N (%) | P-value |
|--------------------------|-----------------|-----------------|------------------|---------|
| Total                    | 54,705          | 10,941 (20.00%) | 43,764 (80.00%)  |         |
| Sex                      |                 |                 |                  | 0.999   |
| Male                     | 10,187 (18.63%) | 2,011 (18.44%)  | 8,176 (18.68%)   |         |
| Female                   | 44,485 (81.37%) | 8,897 (81.56%)  | 35,588 (81.32%)  |         |
| Age (years)              | 55.78 ± 17.09   | 55.80 ± 16.65   | 55.77 ± 17.20    | 0.897   |
| DM                       | 3,553 (6.49%)   | 724 (6.62%)     | 2,829 (6.46%)    | 0.558   |
| Hypertension             | 8,091 (14.79%)  | 1,578 (14.42%)  | 6,513 (14.88%)   | 0.228   |
| Hyperlipidaemia          | 1,145 (2.09%)   | 234 (2.14%)     | 911 (2.08%)      | 0.709   |
| Behcet's disease         | 321 (0.59%)     | 62 (0.57%)      | 259 (0.59%)      | 0.834   |
| Giant cell arteritis     | 15 (0.03%)      | 3 (0.03%)       | 12 (0.03%)       | 0.999   |
| Rheumatoid arthritis     | 8,907 (16.28%)  | 1,784 (16.31%)  | 7,123 (16.28%)   | 0.942   |
| Relapsing polychondritis | 71 (0.13%)      | 14 (0.13%)      | 57 (0.13%)       | 0.953   |
| Takayasu's arteritis     | 15 (0.03%)      | 3 (0.03%)       | 12 (0.03%)       | 0.999   |
| COPD                     | 2,931 (5.36%)   | 581 (5.3%)      | 2,350 (5.37%)    | 0.831   |
| Steroid                  | 16,799 (30.71%) | 3,345 (30.57%)  | 13,454 (30.74%)  | 0.737   |
| β blocker                | 12,588 (23.01%) | 2,513 (22.97%)  | 10,075 (23.02%)  | 0.919   |
| CCB                      | 11,553 (21.12%) | 2,342 (21.41%)  | 9,211 (21.05%)   | 0.409   |
| ACEI                     | 13,586 (24.84%) | 2,711 (24.78%)  | 10,875 (24.85%)  | 0.878   |
| ARB                      | 12,718 (23.25%) | 2,620 (23.95%)  | 10,098 (23.07%)  | 0.054   |
| Diuretic                 | 12,440 (22.74%) | 2,429 (22.20%)  | 10,011 (22.87%)  | 0.136   |
| Statin                   | 13,922 (25.45%) | 2,811 (25.69%)  | 11,111 (25.39%)  | 0.516   |

P-value (categorical variable: Chi-square/Fisher's exact test; continuous variable: t-test)

DM = diabetes mellitus; COPD = chronic obstructive pulmonary disease; CCB = calcium channel blocker; ACEI = angiotensin-converting enzyme inhibitor; ARB = angiotensin receptor blocker

4

5

6

1  
2  
3  
4 1  
5  
6  
7 2  
8  
9 3 Table 2 Incidences of aortic aneurysm and dissection and other characteristics during  
10  
11  
12 4 the ten-year follow-up period  
13

| Sjögren's syndrome                        | Total<br>N (%)  | With<br>N (%)   | Without<br>N (%) | P-value |
|-------------------------------------------|-----------------|-----------------|------------------|---------|
| <b>Total</b>                              | 54,705          | 10,941 (20.00%) | 43,764 (80.00%)  |         |
| <b>Aortic aneurysm<br/>and dissection</b> | 207 (0.38%)     | 47 (0.43%)      | 160 (0.37%)      | 0.045   |
| <b>Sex</b>                                |                 |                 |                  | 0.999   |
| Male                                      | 10,187 (18.63%) | 2,011 (18.44%)  | 8,176 (18.68%)   |         |
| Female                                    | 44,485 (81.37%) | 8,897 (81.56%)  | 35,588 (81.32%)  |         |
| <b>Age (years)</b>                        | 61.36 ± 5.41    | 60.90 ± 4.98    | 61.47 ± 5.51     | <0.001  |
| <b>DM</b>                                 | 7,603 (13.90%)  | 846 (7.73%)     | 6,757 (15.44%)   | <0.001  |
| <b>Hypertension</b>                       | 8,821 (16.12%)  | 1,708 (15.61%)  | 7,113 (16.25%)   | 0.102   |
| <b>Hyperlipidaemia</b>                    | 1,128 (2.06%)   | 240 (2.19%)     | 888 (2.03%)      | 0.279   |
| <b>Behcet's disease</b>                   | 324 (0.59%)     | 63 (0.58%)      | 261 (0.60%)      | 0.802   |
| <b>Giant cell arteritis</b>               | 16 (0.03%)      | 3 (0.03%)       | 13 (0.03%)       | 0.901   |
| <b>Rheumatoid arthritis</b>               | 9,033 (16.51%)  | 1,774 (16.21%)  | 7,259 (16.59%)   | 0.348   |
| <b>Relapsing<br/>polychondritis</b>       | 80 (0.15%)      | 19 (0.17%)      | 61 (0.14%)       | 0.401   |
| <b>Takayasu's arteritis</b>               | 15 (0.03%)      | 3 (0.03%)       | 12 (0.03%)       | 0.999   |
| <b>COPD</b>                               | 3,593 (6.57%)   | 652 (5.96%)     | 2,941 (6.72%)    | 0.004   |
| <b>CCI_R</b>                              | 0.78 ± 1.53     | 0.83 ± 1.39     | 0.77 ± 1.56      | <0.001  |
| <b>Steroid</b>                            | 17,112 (31.28%) | 3,511 (32.09%)  | 13,601 (31.08%)  | 0.041   |
| <b>β blockers</b>                         | 13,750 (25.13%) | 2,674 (24.44%)  | 11,076 (25.31%)  | 0.061   |
| <b>CCB</b>                                | 11,833 (21.63%) | 2,397 (21.91%)  | 9,436 (21.56%)   | 0.430   |
| <b>ACEI</b>                               | 13,793 (25.21%) | 2,784 (25.45%)  | 11,009 (25.16%)  | 0.532   |
| <b>ARB</b>                                | 12,976 (23.72%) | 2,681 (24.50%)  | 10,295 (23.52%)  | 0.031   |
| <b>Diuretic</b>                           | 12,692 (23.20%) | 2,507 (22.91%)  | 10,185 (23.27%)  | 0.427   |
| <b>Statin</b>                             | 14,123 (25.82%) | 2,828 (25.85%)  | 11,295 (25.81%)  | 0.934   |

P-value (categorical variable: Chi-square/Fisher's exact test; continuous variable: t-test)

CCI\_R = Charlson comorbidity index removed DM, COPD; DM = diabetes mellitus; COPD = chronic obstructive pulmonary disease; CCB = calcium channel blocker; ACEI = angiotensin-converting enzyme inhibitor; ARB = angiotensin receptor

blocker

1

2

3 Table 3 Factors associated with aortic aneurysm and dissection according to Cox

4 regression

| Variables            | Crude HR | 95% CI      | P-value | Adjusted HR | 95% CI      | P-value |
|----------------------|----------|-------------|---------|-------------|-------------|---------|
| Sjögren's syndrome   | 3.205    | 2.254-3.565 | < 0.001 | 3.642       | 2.527-5.250 | < 0.001 |
| Sex (male)           | 2.645    | 1.974-3.597 | < 0.001 | 2.035       | 1.534-2.700 | < 0.001 |
| Age (years)          | 1.049    | 1.032-1.057 | < 0.001 | 1.043       | 1.032-1.055 | < 0.001 |
| DM                   | 1.704    | 1.389-1.944 | 0.024   | 1.674       | 1.065-1.976 | 0.037   |
| Hypertension         | 1.165    | 1.022-1.454 | 0.038   | 1.305       | 0.973-1.751 | 0.075   |
| Hyperlipidaemia      | 1.211    | 0.594-2.436 | 0.618   | 1.343       | 0.656-2.751 | 0.420   |
| Rheumatoid arthritis | 1.645    | 0.774-3.496 | 0.196   | 0.801       | 0.362-1.769 | 0.583   |
| COPD                 | 1.838    | 1.256-2.691 | 0.002   | 1.170       | 0.790-1.735 | 0.433   |
| CCI_R                | 1.036    | 0.945-1.087 | 0.074   | 1.016       | 0.968-1.065 | 0.527   |
| Steroid              | 1.497    | 0.598-2.976 | 0.495   | 1.501       | 0.339-3.298 | 0.617   |
| β blockers           | 1.468    | 0.453-2.772 | 0.862   | 1.398       | 0.401-2.895 | 0.803   |
| CCB                  | 1.345    | 0.343-2.901 | 0.372   | 1.402       | 0.452-2.806 | 0.280   |
| ACEI                 | 1.298    | 0.426-3.041 | 0.601   | 1.288       | 0.395-2.845 | 0.334   |
| ARB                  | 1.346    | 0.379-1.986 | 0.711   | 1.345       | 0.343-1.886 | 0.682   |
| Diuretic             | 1.198    | 0.598-2.511 | 0.652   | 1.201       | 0.490-2.907 | 0.703   |
| Statin               | 1.364    | 0.667-4.972 | 0.798   | 1.335       | 0.679-4.787 | 0.897   |

HR= hazard ratio; CI = confidence interval; Adjusted HR: adjusted variables listed in the table;

CCI\_R = Charlson comorbidity index removed DM, COPD; DM = diabetes mellitus; COPD = chronic obstructive pulmonary disease; CCB = calcium channel blocker; ACEI = angiotensin-converting enzyme inhibitor; ARB = angiotensin receptor blocker

5

1  
2  
3  
4  
5  
6  
7  
8  
9  
10  
11  
12  
13  
14  
15  
16  
17  
18  
19  
20  
21  
22  
23  
24  
25  
26  
27  
28  
29  
30  
31  
32  
33  
34  
35  
36  
37  
38  
39  
40  
41  
42  
43  
44  
45  
46  
47

Table 4 Factors associated with aortic aneurysm and dissection stratified by primary/secondary Sjögren's syndrome using Cox regression

|                       | Patients with Sjögren's syndrome |           |                                            | Patients without Sjögren's syndrome |            |                                            | Ratio | Adjusted HR* | 95% CI      | P-value |
|-----------------------|----------------------------------|-----------|--------------------------------------------|-------------------------------------|------------|--------------------------------------------|-------|--------------|-------------|---------|
|                       | Events                           | PY        | Incidence rate<br>(per 10 <sup>5</sup> PY) | Events                              | PY         | Incidence rate<br>(per 10 <sup>5</sup> PY) |       |              |             |         |
| Total                 | 47                               | 55,860.08 | 84.14                                      | 160                                 | 253,779.88 | 63.05                                      | 1.335 | 3.642        | 2.527-5.250 | < 0.001 |
| Without RA/SLE/SS/PBC | 30                               | 36,607.55 | 81.95                                      | 158                                 | 248,694.36 | 63.53                                      | 1.290 | 1.753        | 1.108-9.382 | 0.042   |
| With RA/SLE/SS/PBC    | 17                               | 19,252.53 | 88.30                                      | 2                                   | 5,085.52   | 39.33                                      | 2.245 | 3.693        | 2.520-5.411 | < 0.001 |

PYs = person-years; Ratio = incidence of patients with AA/AD divided by the incidence of patients without AA/AD; \*Adjusted HR = adjusted hazard ratio: adjusted for age, sex, co-morbidities, and medications, as listed in Table 3, using Cox regression; CI = confidence interval; RA = rheumatoid arthritis ; SLE = systemic lupus erythematosus ; SS = systemic sclerosis ; PBC = primary biliary cirrhosis

Primary Sjögren's syndrome: Sjögren's syndrome without systemic lupus erythematosus, rheumatoid arthritis, systemic sclerosis, or primary biliary cirrhosis; Secondary Sjögren's syndrome: Sjögren's syndrome with systemic lupus erythematosus, rheumatoid arthritis , systemic sclerosis, or primary biliary cirrhosis

## 1 DISCUSSION

2 This is a retrospective cohort study including 10,941 patients with SS and 43,764  
3 patients without SS matched by age, sex, year of index date of the SS diagnosis,  
4 co-morbidities, and medication use from a large-scale nationwide population-based  
5 database. During follow-up, SS was associated with an increased incidence of the  
6 development of AA/AD compared with the comparison cohort.

7 Our research findings should remind healthcare providers of new information  
8 that SS patients exhibit an increased risk for AA or AD. Healthcare professionals  
9 should be aware of these life-threatening aortic events and aim to make early  
10 diagnosis of AA or AD. When SS patients present with chest, back, or abdominal  
11 symptoms, the possibility of AA or AD should be considered, with a specific and  
12 rapid examination.

13 SS patients exhibit an increased prevalence of developing traditional  
14 cardiovascular risk factors, such as hypertension and dyslipidaemia, which predispose  
15 patients to endothelial dysfunction and premature atherosclerosis. However, the  
16 disease-specific mechanisms associated with premature atherosclerosis in SS are not  
17 fully understood.[19] In a recent review article, cardiovascular disease was reported to  
18 be one of the primary causes of mortality in SS patients.[20] PSS shares clinical and  
19 serological features with RA and SLE, and these two diseases are associated with

1 acceleration of atherosclerosis.[21] However, the pathophysiology between SS and  
2  
3  
4  
5  
6  
7  
8  
9  
10  
11  
12  
13  
14  
15  
16  
17  
18  
19  
20  
21  
22  
23  
24  
25  
26  
27  
28  
29  
30  
31  
32  
33  
34  
35  
36  
37  
38  
39  
40  
41  
42  
43  
44  
45  
46  
47  
48  
49  
50  
51  
52  
53  
54  
55  
56  
57  
58  
59  
60

1 acceleration of atherosclerosis.[21] However, the pathophysiology between SS and  
2 AA or AD remains unclear, although several possible mechanisms have been  
3 proposed. Previous studies have demonstrated that both SS and AA/AD are induced  
4 by chronic inflammation.[22-25] Recent studies have provided convincing evidence  
5 indicating that several signalling pathways are involved in both AA and SS, including  
6 the MAPK, TGF- $\beta$ , and MMP signalling pathways.[12-15] Activation of the innate  
7 immune system and the production of interferons (IFNs) could be the first stages of  
8 PSS pathogenesis.[26] IFNs and IL-21 could induce B-cell-activating factor (BAFF)  
9 and further activate B cell activity. In human salivary gland cells, interferon- $\gamma$   
10 modulates and increases MMP-2 and MMP-9 expression.[27] The circulating levels  
11 of MMP-9 were increased in patients with definite SS compared with patients with  
12 possible SS.[28] Furthermore, MMP-2 and MMP-9 also display a critical role in AAA  
13 formation.[29] MMPs play roles in tissue destruction and the weakening of the matrix,  
14 as noted in liver cirrhosis, fibrotic lung disease, otosclerosis, atherosclerosis, and  
15 multiple sclerosis.[30] Several molecules that are activated in the salivary glands,  
16 including JNK, NF- $\kappa$ B, and TGF- $\beta$ , also lead to inflammation and reactive oxygen  
17 species (ROS) production in the aortic matrix. This process may be a possible  
18 mechanistic pathway by which SS aggravates AA or AD.[12,13,22,31-34]

19 Low-dose steroids, such as prednisone, may be used to treat SS-induced joint and

1 muscle pain. Prolonged or high-dose corticosteroid treatment likely causes  
2 disintegration of connective tissue of the media possibly together with primary aortic  
3 wall involvement and/or vascular damage in patients with autoimmune disorders,  
4 which can result in aortic aneurysmal enlargement and AD.[30,35] In this study, the  
5 medical condition of steroids was matched. Therefore, the effect of steroids was  
6 mitigated. The strength of our study involves its population-based database design.  
7 We accounted for several aneurysm-related confounding factors. Although we  
8 adjusted the results extensively using Cox regression models, our study had several  
9 limitations and unmeasured confounders. The NHIRD registry is not able to provide  
10 detailed information on laboratory results, family histories and health-related lifestyle  
11 factors, such as alcohol consumption and tobacco use, which can increase the risk of  
12 AA/AD and were potential confounding factors in this study. This is a database study  
13 using NHIRD. All medical conditions for each case and the controls were categorized  
14 using the ICD-9-CM, in which diagnostic codes (up to five each) are coded. There  
15 may be a small number of coding errors or missing information when using this kind  
16 of administrative data, and limitations are bound to exist in any statistical method,  
17 even the propensity score matching. In our study, we also considered COPD incidence  
18 as a proxy variable for tobacco use to eliminate its potential confounding effect.[18]  
19 The limitation is that not all smokers develop disease. Although our study identified

1 the association between SS and AA/AD, the cohort study design did not enable  
2  
3  
4  
5  
6  
7  
8  
9  
10  
11  
12  
13  
14  
15  
16  
17  
18  
19  
20  
21  
22  
23  
24  
25  
26  
27  
28  
29  
30  
31  
32  
33  
34  
35  
36  
37  
38  
39  
40  
41  
42  
43  
44  
45  
46  
47  
48  
49  
50  
51  
52  
53  
54  
55  
56  
57  
58  
59  
60

1 the association between SS and AA/AD, the cohort study design did not enable  
2 determination of the cause-effect relationship. Further prospective follow-up studies,  
3 mechanistic studies and animal experiments should be performed.

#### 4 **CONCLUSION**

5 Patients with SS exhibit an increased risk for developing AA or AD, and  
6 healthcare professionals should be aware of this risk when treating patients with SS.  
7 Increased aortic surveillance may be required in patients with SS.

#### 8 **ACKNOWLEDGEMENTS**

9 This study was supported by grants from Tri-Service General Hospital, National  
10 Defense Medical Center, Taipei, Taiwan (TSGH-C105-058), Tri-Service General  
11 Hospital, National Defense Medical, Taipei, Taiwan (TSGH-C105-173), Taoyuan  
12 Armed Forces General Hospital, Taoyuan, Taiwan (10514), and the Ministry of  
13 Science and Technology (MOST 106-2314-B-016 -008 -MY3).

#### 14 **FUNDING**

15 This study was supported by grants from Tri-Service General Hospital, National  
16 Defense Medical Center, Taipei, Taiwan (TSGH-C105-058), Tri-Service General  
17 Hospital, National Defense Medical Center, Taipei, Taiwan (TSGH-C105-173),  
18 Taoyuan Armed Forces General Hospital, Taoyuan, Taiwan (10514), and the Ministry  
19 of Science and Technology (MOST 106-2314-B-016 -008 -MY3).



1  
2  
3  
4 **1 COMPETING INTERESTS**  
5

6  
7 2 None declared.  
8

9  
10 **3 AUTHOR CONTRIBUTIONS**  
11

12 4 Y-DT, J-CW, and S-HT conceived and designed the study.  
13

14  
15 5 W-CC provided the materials for the study. C-HC and S-JC analysed the data.  
16

17  
18 6 C-JY and M-TL contributed reagents, materials, and analysis tools. Y-DT, J-CW,  
19

20  
21 7 W-IL, and S-HT wrote the manuscript. All the authors approved the manuscript.  
22

23  
24 **8 DATA SHARING STATEMENT**  
25

26  
27 9 No additional data sharing available.  
28

29  
30  
31  
32  
33  
34  
35  
36  
37  
38  
39  
40  
41  
42  
43  
44  
45  
46  
47  
48  
49  
50  
51  
52  
53  
54  
55  
56  
57  
58  
59  
60

10

1  
2  
3  
4 **1 REFERENCES**  
5

- 6  
7 2 1. Vitali C, Bombardieri S, Jonsson R, et al. Classification criteria for Sjögren's  
8  
9 3 syndrome: a revised version of the European criteria proposed by the  
10  
11 4 American-European Consensus Group. *Ann Rheum Dis* 2002;61:554-8.  
12  
13  
14  
15 5 2. Mavragani CP, Moutsopoulos HM. The geoepidemiology of Sjögren's  
16  
17 6 syndrome. *Autoimmun Rev* 2010;9:A305-10.  
18  
19  
20 7 3. Howard DP, Banerjee A, Fairhead JF, et al. Population-based study of  
21  
22 8 incidence and outcome of acute aortic dissection and premorbid risk factor  
23  
24 9 control: 10-year results from the Oxford Vascular Study. *Circulation*  
25  
26 10 2013;127:2031-7.  
27  
28  
29  
30  
31 11 4. Olsson C, Thelin S, Stahle E, et al. Thoracic aortic aneurysm and dissection:  
32  
33 12 increasing prevalence and improved outcomes reported in a nationwide  
34  
35 13 population-based study of more than 14,000 cases from 1987 to 2002.  
36  
37 14 *Circulation* 2006;114:2611-8.  
38  
39  
40  
41  
42  
43 15 5. Yeh TY, Chen CY, Huang JW, et al. Epidemiology and medication utilization  
44  
45 16 pattern of aortic dissection in Taiwan: a population-based study. *Medicine*  
46  
47 17 (*Baltimore*) 2015;94:e1522.  
48  
49  
50  
51 18 6. Shovman O, Tiosano S, Comaneshter D, et al. Aortic aneurysm associated  
52  
53 19 with rheumatoid arthritis: a population-based cross-sectional study. *Clin*

- 1  
2  
3  
4 1 *Rheumatol* 2016;35:2657-61.
- 5  
6  
7 2 7. Guy A, Tiosano S, Comaneshter D, et al. Aortic aneurysm association with  
8  
9  
10 3 SLE - a case-control study. *Lupus* 2016;25:959-63.
- 11  
12 4 8. Juarez M, Toms TE, de Pablo P, et al. Cardiovascular risk factors in women  
13  
14  
15 5 with primary Sjögren's syndrome: United Kingdom primary Sjögren's  
16  
17  
18 6 syndrome registry results. *Arthritis Care Res (Hoboken)* 2014;66:757-64.
- 19  
20  
21 7 9. Garcia AB, Dardin LP, Minali PA, et al. Asymptomatic atherosclerosis in  
22  
23  
24 8 primary Sjögren syndrome: correlation between low ankle brachial index and  
25  
26  
27 9 autoantibodies positivity. *J Clin Rheumatol* 2016;22:295-8.
- 28  
29 10 10. Chiang CH, Liu CJ, Chen PJ, et al. Primary Sjögren's syndrome and risk of  
30  
31  
32 11 ischemic stroke: a nationwide study. *Clin Rheumatol* 2014;33:931-7.
- 33  
34  
35 12 11. Chiang CH, Liu CJ, Chen PJ, et al. Primary Sjögren's syndrome and the risk of  
36  
37  
38 13 acute myocardial infarction: a nationwide study. *Acta Cardiol Sin*  
39  
40  
41 14 2013;29:124-31.
- 42  
43  
44 15 12. Soejima K, Nakamura H, Tamai M, et al. Activation of MKK4 (SEK1), JNK,  
45  
46  
47 16 and c-Jun in labial salivary infiltrating T cells in patients with Sjögren's  
48  
49  
50 17 syndrome. *Rheumatol Int* 2007;27:329-33.
- 51  
52 18 13. Nakamura H, Kawakami A, Yamasaki S, et al. Expression of mitogen  
53  
54  
55 19 activated protein kinases in labial salivary glands of patients with Sjögren's  
56  
57  
58  
59  
60

- 1  
2  
3  
4 1 syndrome. *Ann Rheum Dis* 1999;58:382-5.  
5  
6  
7 2 14. Ito S, Ozawa K, Zhao J, et al. Olmesartan inhibits cultured rat aortic smooth  
8  
9 3 muscle cell death induced by cyclic mechanical stretch through the inhibition  
10  
11 4 of the c-Jun N-terminal kinase and p38 signaling pathways. *J Pharmacol Sci*  
12  
13 2015;127:69-74.  
14  
15  
16  
17 6 15. Zhang Y, Naggar JC, Welzig CM, et al. Simvastatin inhibits angiotensin  
18  
19 7 II-induced abdominal aortic aneurysm formation in apolipoprotein E-knockout  
20  
21 8 mice: possible role of ERK. *Arterioscler Thromb Vasc Biol* 2009;29:1764-71.  
22  
23  
24  
25  
26 9 16. Cheng CL, Kao YH, Lin SJ, et al. Validation of the National Health Insurance  
27  
28 10 Research Database with ischemic stroke cases in Taiwan. *Pharmacoepidemiol*  
29  
30 11 *Drug Saf* 2011;20:236-42.  
31  
32  
33  
34 12 17. Mao CT, Tsai ML, Wang CY, et al. Outcomes and characteristics of patients  
35  
36 13 undergoing percutaneous angioplasty followed by below-knee or above-knee  
37  
38 14 amputation for peripheral artery disease. *PLoS One* 2014;9:e111130.  
39  
40  
41  
42  
43 15 18. Yu TM, Chuang YW, Yu MC, et al. Risk of cancer in patients with polycystic  
44  
45 16 kidney disease: a propensity-score matched analysis of a nationwide,  
46  
47 17 population-based cohort study. *Lancet Oncol* 2016;17:1419-25.  
48  
49  
50  
51 18 19. Valim V, Gerdtts E, Jonsson R, et al. Atherosclerosis in Sjögren's syndrome:  
52  
53 19 evidence, possible mechanisms and knowledge gaps. *Clin Exp Rheumatol*

- 1  
2  
3  
4 1 2016;34:133-42.  
5  
6  
7 2 20. Singh AG, Singh S, Matteson EL. Rate, risk factors and causes of mortality in  
8  
9 3 patients with Sjögren's syndrome: a systematic review and meta-analysis of  
10  
11 4 cohort studies. *Rheumatology (Oxford)* 2016;55:450-60.  
12  
13  
14  
15 5 21. Sezis Demirci M, Karabulut G, Gungor O, et al. Is there an increased arterial  
16  
17 6 stiffness in patients with primary Sjögren's syndrome? *Intern Med*  
18  
19 7 2016;55:455-9.  
20  
21  
22  
23 8 22. Sawada H, Hao H, Naito Y, et al. Aortic iron overload with oxidative stress  
24  
25 9 and inflammation in human and murine abdominal aortic aneurysm.  
26  
27 10 *Arterioscler Thromb Vasc Biol* 2015;35:1507-14.  
28  
29  
30  
31 11 23. Vadacca M, Margiotta D, Sambataro D, et al. [BAFF/APRIL pathway in  
32  
33 12 Sjögren syndrome and systemic lupus erythematosus: relationship with  
34  
35 13 chronic inflammation and disease activity]. *Reumatismo* 2010;62:259-65.  
36  
37  
38  
39 14 24. Cifani N, Proietta M, Tritapepe L, et al. Stanford-A acute aortic dissection,  
40  
41 15 inflammation, and metalloproteinases: a review. *Ann Med* 2015;47:441-6.  
42  
43  
44  
45 16 25. Eagleton MJ. Inflammation in abdominal aortic aneurysms: cellular infiltrate  
46  
47 17 and cytokine profiles. *Vascular* 2012;20:278-83.  
48  
49  
50  
51 18 26. Nocturne G, Mariette X. Advances in understanding the pathogenesis of  
52  
53 19 primary Sjögren's syndrome. *Nat Rev Rheumatol* 2013;9:544-56.  
54  
55  
56  
57  
58  
59  
60

- 1  
2  
3  
4 1 27. Wu AJ, Lafrenie RM, Park C, et al. Modulation of MMP-2 (gelatinase A) and  
5  
6  
7 2 MMP-9 (gelatinase B) by interferon-gamma in a human salivary gland cell  
8  
9  
10 3 line. *J Cell Physiol* 1997;171:117-24.  
11  
12 4 28. Hulkkonen J, Pertovaara M, Antonen J, et al. Matrix metalloproteinase 9  
13  
14  
15 5 (MMP-9) gene polymorphism and MMP-9 plasma levels in primary Sjögren's  
16  
17  
18 6 syndrome. *Rheumatology (Oxford)* 2004;43:1476-9.  
19  
20  
21 7 29. Dale MA, Suh MK, Zhao S, et al. Background differences in baseline and  
22  
23  
24 8 stimulated MMP levels influence abdominal aortic aneurysm susceptibility.  
25  
26  
27 9 *Atherosclerosis* 2015;243:621-9.  
28  
29 10 30. Amalinei C, Caruntu ID, Giusca SE, et al. Matrix metalloproteinases  
30  
31  
32 11 involvement in pathologic conditions. *Rom J Morphol Embryol*  
33  
34  
35 12 2010;51:215-28.  
36  
37  
38 13 31. Zoukhri D, Macari E, Choi SH, et al. c-Jun NH2-terminal kinase mediates  
39  
40  
41 14 interleukin-1beta-induced inhibition of lacrimal gland secretion. *J Neurochem*  
42  
43  
44 15 2006;96:126-35.  
45  
46  
47 16 32. Tsai SH, Huang PH, Peng YJ, et al. Zoledronate attenuates angiotensin  
48  
49  
50 17 II-induced abdominal aortic aneurysm through inactivation of  
51  
52  
53 18 Rho/ROCK-dependent JNK and NF-kappaB pathway. *Cardiovasc Res*  
54  
55  
56 19 2013;100:501-10.  
57  
58  
59  
60

- 1  
2  
3  
4 1 33. Hall BE, Zheng C, Swaim WD, et al. Conditional overexpression of  
5  
6 2 TGF-beta1 disrupts mouse salivary gland development and function. *Lab*  
7  
8  
9 3 *Invest* 2010;90:543-55.  
10  
11  
12 4 34. Jones JA, Spinale FG, Ikonomidis JS. Transforming growth factor-beta  
13  
14  
15 5 signaling in thoracic aortic aneurysm development: a paradox in pathogenesis.  
16  
17 6 *J Vasc Res* 2009;46:119-37.  
18  
19  
20 7 35. Sholter DE, Armstrong PW. Adverse effects of corticosteroids on the  
21  
22  
23 8 cardiovascular system. *Can J Cardiol* 2000;16:505-11.  
24  
25  
26 9  
27  
28  
29  
30  
31  
32  
33  
34  
35  
36  
37  
38  
39  
40  
41  
42  
43  
44  
45  
46  
47  
48  
49  
50  
51  
52  
53  
54  
55  
56  
57  
58  
59  
60

1  
2  
3  
4 **1 FIGURE LEGENDS**

5  
6  
7 2 Figure 1. Patient selection flowchart

8  
9 3 Figure 2. Kaplan-Meier curve of the cumulative risk of aortic aneurysm or dissection  
10  
11  
12 4 due to Sjögren's syndrome

13  
14  
15  
16  
17  
18 **6 TABLE LEGENDS**

19  
20  
21 7 Table 1. Characteristics of the study participants at baseline

22  
23 8 Table 2. Incidences of aortic aneurysm and dissection and other characteristics during  
24  
25  
26 9 the ten-year follow-up period

27  
28  
29 10 Table 3. Factors associated with aortic aneurysm and dissection according to Cox  
30  
31  
32 11 regression

33  
34  
35 12 Table 4. Factors associated with aortic aneurysm or dissection stratified by  
36  
37  
38 13 primary/secondary SS using Cox regression

39  
40  
41  
42  
43 **15 SUPPLEMENTARY MATERIAL**

44  
45  
46 16 Supplement Table 1 ICD-9-CM coding of diseases in the manuscript

47  
48  
49 17 Supplement Table 2 Years of follow-up

50  
51  
52 18 Supplement Table 3 Years to AA /AD

53  
54  
55 19 Supplement Table 4 Variables including in the Cox regression



- 1 Supplement Table 5 First event of the (AA/AD) coding distribution
- 2 Supplement Figure 1. Sex-specific incidence of AA or AD in the study cohort, control
- 3 cohort, and general population.
- 4 Supplement Figure 2. Age-specific incidence of AA or AD in the study cohort, control
- 5 cohort, and general population.
- 6



127x95mm (300 x 300 DPI)

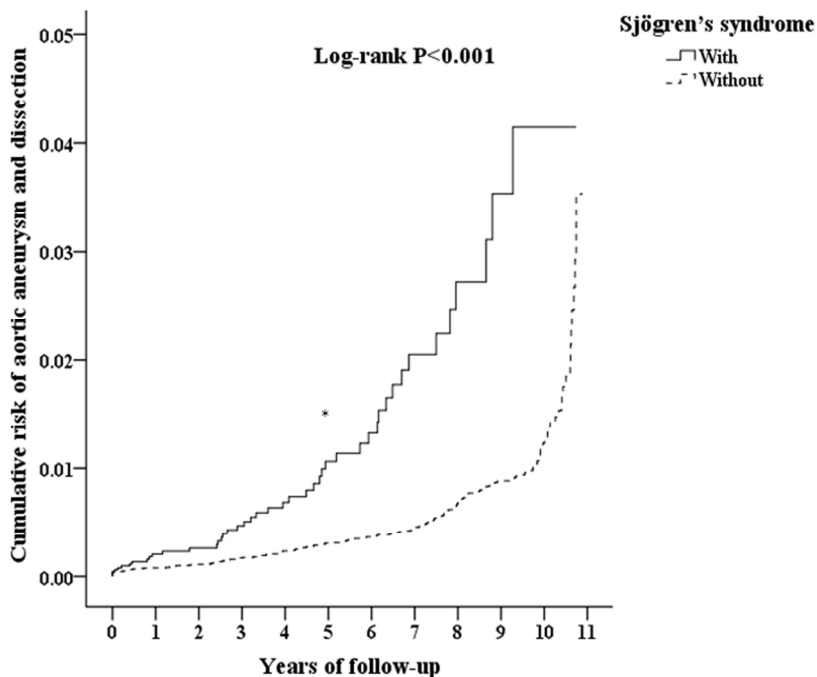

|                                       |       |       |       |       |       |       |       |        |        |        |        |
|---------------------------------------|-------|-------|-------|-------|-------|-------|-------|--------|--------|--------|--------|
| With Sjögren's syndrome (N=10,941)    | 13    | 15    | 21    | 26    | 32    | 35    | 41    | 44     | 46     | 47     | 47     |
| Without Sjögren's syndrome (N=43,764) | 27    | 36    | 49    | 63    | 77    | 81    | 94    | 113    | 130    | 146    | 160    |
| <b>P value</b>                        | 0.897 | 0.513 | 0.275 | 0.102 | 0.036 | 0.015 | 0.001 | <0.001 | <0.001 | <0.001 | <0.001 |

\*:P<0.05 is considered statistically significant

145x124mm (300 x 300 DPI)

Only

1  
2  
3  
4  
5  
6  
7  
8  
9  
10  
11  
12  
13  
14  
15  
16  
17  
18  
19  
20  
21  
22  
23  
24  
25  
26  
27  
28  
29  
30  
31  
32  
33  
34  
35  
36  
37  
38  
39  
40  
41  
42  
43  
44  
45  
46  
47  
48  
49  
50  
51  
52  
53  
54  
55  
56  
57  
58  
59  
60



90x57mm (300 x 300 DPI)

view only



90x29mm (300 x 300 DPI)

peer review only

Supplement Table 1 ICD-9-CM coding of diseases in manuscript

| Disease                           | ICD-9-CM    | Disease                   | ICD-9-CM |
|-----------------------------------|-------------|---------------------------|----------|
| Aortic aneurysm<br>and dissection | 441.0-441.9 | Behcet's disease          | 136.1    |
| Sjögren's syndrome                | 710.2       | Giant cell arteritis      | 446.5    |
| Turner syndrome                   | 758.6       | RA                        | 714      |
| Aortic coarctation                | 747.10      | Relapsing polychondritis  | 733.99   |
| Bicuspid aortic valve             | 746.4       | Takayasu's arteritis      | 446.7    |
| Marfan syndrome                   | 759.82      | COPD                      | 490-496  |
| Ehler-Danlos syndrome             | 756.83      | SLE                       | 710.0    |
| Diabetes mellitus                 | 250         | Systemic sclerosis        | 701.1    |
| Hypertension                      | 401-405     | Primary biliary cirrhosis | 571.6    |
| Hyperlipidaemia                   | 272.0-272.4 |                           |          |

RA = Rheumatoid arthritis and other inflammatory polyarthropathies; COPD = chronic obstructive pulmonary disease; SLE = systemic lupus erythematosus

Supplement Table 2 Years of follow-up

| <b>Sjögren's syndrome</b> | <b>Min</b> | <b>Middle</b> | <b>Max</b> | <b>Mean±SD</b> |
|---------------------------|------------|---------------|------------|----------------|
| <b>With</b>               | 0.50       | 3.26          | 10.91      | 5.11±7.52      |
| <b>Without</b>            | 0.50       | 4.57          | 10.98      | 5.80±5.53      |
| <b>Total</b>              | 0.50       | 3.69          | 10.98      | 5.66±5.99      |

For peer review only

Supplement Table 3 Years to AA /AD

| <b>Sjögren's syndrome</b> | <b>Min</b> | <b>Middle</b> | <b>Max</b> | <b>Mean±SD</b> |
|---------------------------|------------|---------------|------------|----------------|
| <b>With</b>               | 0.51       | 3.32          | 9.27       | 4.67±3.82      |
| <b>Without</b>            | 0.52       | 5.07          | 10.87      | 5.53±3.65      |
| <b>Total</b>              | 0.51       | 4.93          | 10.87      | 5.12±3.49      |

For peer review only



Supplement Table 4 Variables including in the Cox regression

| Variables            | Variables        |
|----------------------|------------------|
| Sjögren's syndrome   | CCI_R            |
| Sex (male)           | Steroid          |
| Age (years)          | $\beta$ blockers |
| DM                   | CCB              |
| Hypertension         | ACEI             |
| Hyperlipidaemia      | ARB              |
| Rheumatoid arthritis | Diuretic         |
| COPD                 | Statin           |

DM = diabetes mellitus; COPD = chronic obstructive pulmonary disease; CCB = calcium channel blocker; ACEI = angiotensin-converting enzyme inhibitor; ARB = angiotensin receptor blocker

Supplement Table 5 First event of (AA / AD) coding distribution

| Sjögren's syndrome | Inpatient |       | ER |       |
|--------------------|-----------|-------|----|-------|
|                    | N         | %     | N  | %     |
| With               | 40        | 85.11 | 7  | 14.89 |
| Without            | 141       | 88.12 | 19 | 11.88 |
| Total              | 181       | 87.44 | 26 | 12.56 |

For peer review only

**STROBE 2007 (v4) Statement—Checklist of items that should be included in reports of *cohort studies***

| Section/Topic                | Item # | Recommendation                                                                                                                                                                       | Reported on page # |
|------------------------------|--------|--------------------------------------------------------------------------------------------------------------------------------------------------------------------------------------|--------------------|
| Title and abstract           | 1      | (a) Indicate the study's design with a commonly used term in the title or the abstract                                                                                               | 3                  |
|                              |        | (b) Provide in the abstract an informative and balanced summary of what was done and what was found                                                                                  | 3-4                |
| <b>Introduction</b>          |        |                                                                                                                                                                                      |                    |
| Background/rationale         | 2      | Explain the scientific background and rationale for the investigation being reported                                                                                                 | 6                  |
| Objectives                   | 3      | State specific objectives, including any prespecified hypotheses                                                                                                                     | 7                  |
| <b>Methods</b>               |        |                                                                                                                                                                                      |                    |
| Study design                 | 4      | Present key elements of study design early in the paper                                                                                                                              | 11                 |
| Setting                      | 5      | Describe the setting, locations, and relevant dates, including periods of recruitment, exposure, follow-up, and data collection                                                      | 10-11              |
| Participants                 | 6      | (a) Give the eligibility criteria, and the sources and methods of selection of participants. Describe methods of follow-up                                                           | 9                  |
|                              |        | (b) For matched studies, give matching criteria and number of exposed and unexposed                                                                                                  | 11                 |
| Variables                    | 7      | Clearly define all outcomes, exposures, predictors, potential confounders, and effect modifiers. Give diagnostic criteria, if applicable                                             | 9-10               |
| Data sources/<br>measurement | 8*     | For each variable of interest, give sources of data and details of methods of assessment (measurement). Describe comparability of assessment methods if there is more than one group | 10                 |
| Bias                         | 9      | Describe any efforts to address potential sources of bias                                                                                                                            | 19                 |
| Study size                   | 10     | Explain how the study size was arrived at                                                                                                                                            | 17                 |
| Quantitative variables       | 11     | Explain how quantitative variables were handled in the analyses. If applicable, describe which groupings were chosen and why                                                         | 9-10               |
| Statistical methods          | 12     | (a) Describe all statistical methods, including those used to control for confounding                                                                                                | 11                 |
|                              |        | (b) Describe any methods used to examine subgroups and interactions                                                                                                                  | 11                 |
|                              |        | (c) Explain how missing data were addressed                                                                                                                                          | 11                 |
|                              |        | (d) If applicable, explain how loss to follow-up was addressed                                                                                                                       | 11                 |
|                              |        | (e) Describe any sensitivity analyses                                                                                                                                                | 11                 |
| <b>Results</b>               |        |                                                                                                                                                                                      |                    |

|                          |     |                                                                                                                                                                                                              |       |
|--------------------------|-----|--------------------------------------------------------------------------------------------------------------------------------------------------------------------------------------------------------------|-------|
| Participants             | 13* | (a) Report numbers of individuals at each stage of study—eg numbers potentially eligible, examined for eligibility, confirmed eligible, included in the study, completing follow-up, and analysed            | 12-13 |
|                          |     | (b) Give reasons for non-participation at each stage                                                                                                                                                         | 7-8   |
|                          |     | (c) Consider use of a flow diagram                                                                                                                                                                           | 12    |
| Descriptive data         | 14* | (a) Give characteristics of study participants (eg demographic, clinical, social) and information on exposures and potential confounders                                                                     | 12    |
|                          |     | (b) Indicate number of participants with missing data for each variable of interest                                                                                                                          | 11    |
|                          |     | (c) Summarise follow-up time (eg, average and total amount)                                                                                                                                                  | 11    |
| Outcome data             | 15* | Report numbers of outcome events or summary measures over time                                                                                                                                               | 12-13 |
| Main results             | 16  | (a) Give unadjusted estimates and, if applicable, confounder-adjusted estimates and their precision (eg, 95% confidence interval). Make clear which confounders were adjusted for and why they were included | 12    |
|                          |     | (b) Report category boundaries when continuous variables were categorized                                                                                                                                    | 11    |
|                          |     | (c) If relevant, consider translating estimates of relative risk into absolute risk for a meaningful time period                                                                                             | 12    |
| Other analyses           | 17  | Report other analyses done—eg analyses of subgroups and interactions, and sensitivity analyses                                                                                                               | 12    |
| <b>Discussion</b>        |     |                                                                                                                                                                                                              |       |
| Key results              | 18  | Summarise key results with reference to study objectives                                                                                                                                                     | 18    |
| <b>Limitations</b>       |     |                                                                                                                                                                                                              |       |
| Interpretation           | 20  | Give a cautious overall interpretation of results considering objectives, limitations, multiplicity of analyses, results from similar studies, and other relevant evidence                                   | 20    |
| Generalisability         | 21  | Discuss the generalisability (external validity) of the study results                                                                                                                                        | 20    |
| <b>Other information</b> |     |                                                                                                                                                                                                              |       |
| Funding                  | 22  | Give the source of funding and the role of the funders for the present study and, if applicable, for the original study on which the present article is based                                                | 21    |

\*Give information separately for cases and controls in case-control studies and, if applicable, for exposed and unexposed groups in cohort and cross-sectional studies.

**Note:** An Explanation and Elaboration article discusses each checklist item and gives methodological background and published examples of transparent reporting. The STROBE checklist is best used in conjunction with this article (freely available on the Web sites of PLoS Medicine at <http://www.plosmedicine.org/>, Annals of Internal Medicine at <http://www.annals.org/>, and Epidemiology at <http://www.epidem.com/>). Information on the STROBE Initiative is available at [www.strobe-statement.org](http://www.strobe-statement.org).
