# Supplementary material for: Increased risk of aortic aneurysm and dissection in patients with Sjögren’s syndrome: a nationwide population-based cohort study in Taiwan
Source: PubMed Central journal article supplement — BMJ Open. 2018 Sep 21;8(9):e022326. doi: 10.1136/bmjopen-2018-022326 (PMC6157519; doi:10.1136/bmjopen-2018-022326), 2018-09-21
Supplement: bmjopen-2018-022326supp001.pdf [file bmjopen-2018-022326supp001.pdf]

Supplement Table 1 ICD-9-CM coding of diseases in manuscript

| <b>Disease</b>        | <b>ICD-9-CM</b> | <b>Disease</b>            | <b>ICD-9-CM</b> |
|-----------------------|-----------------|---------------------------|-----------------|
| Aortic aneurysm       |                 |                           |                 |
| and dissection        | 441.0-441.9     | Behcet's disease          | 136.1           |
| Sjögren's syndrome    | 710.2           | Giant cell arteritis      | 446.5           |
| Turner syndrome       | 758.6           | RA                        | 714             |
| Aortic coarctation    | 747.10          | Relapsing polychondritis  | 733.99          |
| Bicuspid aortic valve | 746.4           | Takayasu's arteritis      | 446.7           |
| Marfan syndrome       | 759.82          | COPD                      | 490-496         |
| Ehler-Danlos syndrome | 756.83          | SLE                       | 710.0           |
| Diabetes mellitus     | 250             | Systemic sclerosis        | 701.1           |
| Hypertension          | 401-405         | Primary biliary cirrhosis | 571.6           |
| Hyperlipidaemia       | 272.0-272.4     |                           |                 |

RA = Rheumatoid arthritis and other inflammatory polyarthropathies; COPD = chronic obstructive pulmonary disease; SLE = systemic lupus erythematosus

Supplement Table 2 Years of follow-up

| <b>Sjögren's syndrome</b> | <b>Min</b> | <b>Middle</b> | <b>Max</b> | <b>Mean±SD</b> |
|---------------------------|------------|---------------|------------|----------------|
| <b>With</b>               | 0.50       | 3.26          | 10.91      | 5.11±7.52      |
| <b>Without</b>            | 0.50       | 4.57          | 10.98      | 5.80±5.53      |
| <b>Total</b>              | 0.50       | 3.69          | 10.98      | 5.66±5.99      |

Supplement Table 3 Years to AA /AD

| <b>Sjögren's syndrome</b> | <b>Min</b> | <b>Middle</b> | <b>Max</b> | <b>Mean±SD</b> |
|---------------------------|------------|---------------|------------|----------------|
| <b>With</b>               | 0.51       | 3.32          | 9.27       | 4.67±3.82      |
| <b>Without</b>            | 0.52       | 5.07          | 10.87      | 5.53±3.65      |
| <b>Total</b>              | 0.51       | 4.93          | 10.87      | 5.12±3.49      |

## Supplement Table 4 Variables including in the Cox regression

| Variables            | Variables        |
|----------------------|------------------|
| Sjögren's syndrome   | CCI_R            |
| Sex (male)           | Steroid          |
| Age (years)          | $\beta$ blockers |
| DM                   | CCB              |
| Hypertension         | ACEI             |
| Hyperlipidaemia      | ARB              |
| Rheumatoid arthritis | Diuretic         |
| COPD                 | Statin           |

DM = diabetes mellitus; COPD = chronic obstructive pulmonary disease; CCB = calcium channel blocker; ACEI = angiotensin-converting enzyme inhibitor; ARB = angiotensin receptor blocker

Supplement Table 5 First event of (AA / AD) coding distribution

| Sjögren's syndrome | Inpatient |       | ER |       |
|--------------------|-----------|-------|----|-------|
|                    | N         | %     | N  | %     |
| <b>With</b>        | 40        | 85.11 | 7  | 14.89 |
| <b>Without</b>     | 141       | 88.12 | 19 | 11.88 |
| <b>Total</b>       | 181       | 87.44 | 26 | 12.56 |
